# Supplementary material for: Parallel multi-swarm cooperative particle swarm optimization for protein–ligand docking and virtual screening
Source: Springer Nature journal article supplement (doi:10.1186/s12859-022-04711-0), 2022-05-30
Supplement: 12859_2022_4711_MOESM1_ESM.pdf [file 12859_2022_4711_MOESM1_ESM.pdf]

# Parallel Multi-swarm Cooperative Particle Swarm Optimization for protein-ligand docking and virtual screening

Chao Li<sup>1</sup>, Jinxing Li<sup>1</sup>, Jun Sun\*<sup>1</sup>, Li Mao<sup>1</sup>, Vasile Palade<sup>2</sup>, Bilal Ahmad<sup>1</sup>

<sup>1</sup> Department of Computer Science and Technology, Jiangnan University, No.1800, Lihu Avenue, Wuxi, Jiangsu, 214122, People's Republic of China

<sup>2</sup> Center for Computational Science and Mathematical Modeling, Coventry University, Priory Street, Coventry, CV15FB, UK

## More Details for Figure 1

The original optimization population in PSO of PSOVina, shown in the left black dotted box, consists of multiple subswarms of  $N$  particles. The quantity of subswarms is equal to Exhaustiveness value, and different subswarms are expressed as differently colored columns. The right part of figure displays our optimization population, which is composed of slave subswarms of  $N$  particles and a master subswarm with  $m$  particles. The master subswarm is the  $(\text{Exhaustiveness}+1)$ -th subswarm that is newly added and shown as red color.

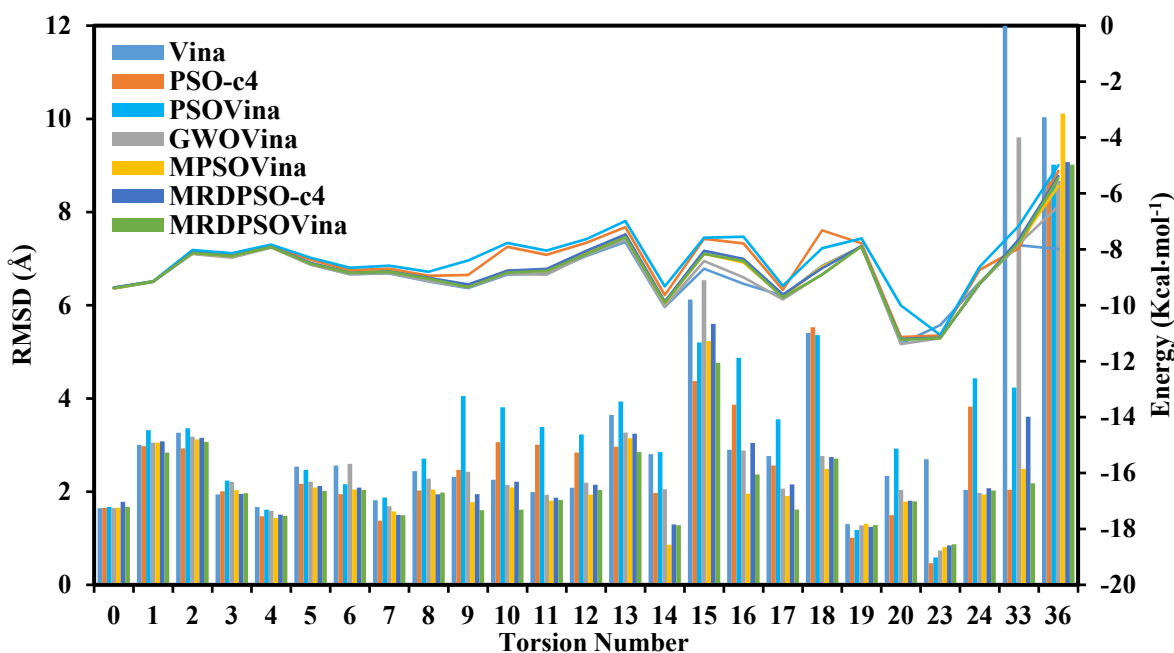

**Figure S1.** The average RMSD and energy comparison of molecules with different torsions.

**Table S1.** The scored-energy of 285 test cases obtained by all compared docking programs

|                |      | Scored-Energy (Kcal·mol <sup>-1</sup> ) |                 |                 |                 |                 |                 |                 |
|----------------|------|-----------------------------------------|-----------------|-----------------|-----------------|-----------------|-----------------|-----------------|
| PDB            | ntor | Vina                                    | PSO-c4          | PSOVina         | GWOVi           | MPSOVi          | MRDPS           | MRDPS           |
|                |      |                                         |                 |                 | na              | na              | O-c4            | OVina           |
| 3jya           | 0    | -8.29                                   | -8.26952        | -8.23285        | -8.25906        | -8.26704        | -8.27321        | -8.25564        |
| 3udh           | 0    | -7.6                                    | -7.60711        | -7.60686        | -7.60628        | -7.60601        | -7.5183         | -7.60686        |
| 4kzu           | 0    | -12.3                                   | -12.2985        | -12.3011        | -12.2987        | -12.3           | -12.2989        | -12.3003        |
| <b>Average</b> |      | <b>-9.39667</b>                         | <b>-9.39171</b> | <b>-9.38027</b> | <b>-9.38801</b> | <b>-9.39103</b> | <b>-9.36347</b> | <b>-9.38758</b> |

|                |          |                 |                 |                 |                 |                 |                 |                 |
|----------------|----------|-----------------|-----------------|-----------------|-----------------|-----------------|-----------------|-----------------|
| <b>1bcu</b>    | <b>1</b> | -7.5            | -7.46477        | -7.46625        | -7.4637         | -7.4639         | -7.46458        | -7.46436        |
| <b>1gpn</b>    | <b>1</b> | -10.88          | -10.8516        | -10.8513        | -10.8513        | -10.8495        | -10.8518        | -10.8516        |
| <b>2xys</b>    | <b>1</b> | -11.2           | -11.1769        | -11.1794        | -11.173         | -11.1765        | -11.1767        | -11.1711        |
| <b>3arv</b>    | <b>1</b> | -11             | -10.9313        | -10.9515        | -10.964         | -10.9491        | -10.9564        | -10.9569        |
| <b>3rsx</b>    | <b>1</b> | -7.8            | -7.83536        | -7.74313        | -7.83371        | -7.81408        | -7.83302        | -7.83496        |
| <b>4ddk</b>    | <b>1</b> | -6.61           | -6.63366        | -6.63074        | -6.63062        | -6.63414        | -6.63377        | -6.63648        |
| <b>Average</b> |          | <b>-9.165</b>   | <b>-9.14893</b> | <b>-9.13705</b> | <b>-9.15273</b> | <b>-9.14785</b> | <b>-9.1527</b>  | <b>-9.15256</b> |
| <hr/>          |          |                 |                 |                 |                 |                 |                 |                 |
| <b>1c5z</b>    | <b>2</b> | -5.8            | -5.76589        | -5.76628        | -5.76831        | -5.76748        | -5.76579        | -5.7665         |
| <b>1o5b</b>    | <b>2</b> | -6.6            | -6.55485        | -6.55505        | -6.56257        | -6.56305        | -6.56358        | -6.532          |
| <b>1r5y</b>    | <b>2</b> | -7.4            | -7.22581        | -6.97486        | -7.41181        | -7.41542        | -7.41358        | -7.28528        |
| <b>1s38</b>    | <b>2</b> | -7.8            | -7.8254         | -7.42735        | -7.81165        | -7.80843        | -7.62361        | -7.80763        |
| <b>2iwx</b>    | <b>2</b> | -9              | -9.01123        | -9.01122        | -9.01161        | -9.01155        | -9.01125        | -9.01126        |
| <b>2weg</b>    | <b>2</b> | -6.2            | -6.13675        | -5.83276        | -6.18656        | -6.13358        | -6.0295         | -6.10743        |
| <b>2yki</b>    | <b>2</b> | -15.56          | -16.5619        | -16.4941        | -16.5621        | -16.563         | -16.5466        | -16.5575        |
| <b>3ary</b>    | <b>2</b> | -7.72           | -7.49516        | -7.36808        | -7.70964        | -7.62023        | -7.59803        | -7.64732        |
| <b>3g2z</b>    | <b>2</b> | -6.87           | -6.19426        | -6.22541        | -6.85998        | -6.59252        | -6.66449        | -6.56383        |
| <b>3gv9</b>    | <b>2</b> | -5.3            | -4.90624        | -4.8928         | -5.34351        | -5.2288         | -5.13603        | -5.29462        |
| <b>3kr8</b>    | <b>2</b> | -12             | -11.9951        | -11.9959        | -11.9985        | -11.998         | -11.9987        | -11.9988        |
| <b>3pxf</b>    | <b>2</b> | -10.3           | -10.2837        | -10.1745        | -10.2039        | -10.175         | -10.1976        | -10.2746        |
| <b>3twp</b>    | <b>2</b> | -5.5            | -5.39845        | -5.36154        | -5.47726        | -5.42926        | -5.39513        | -5.4488         |
| <b>3u5j</b>    | <b>2</b> | -8.7            | -8.70849        | -8.70784        | -8.70985        | -8.708          | -8.57734        | -8.70706        |
| <b>3zt2</b>    | <b>2</b> | -9.73           | -9.73857        | -9.5749         | -9.7661         | -9.75194        | -9.75348        | -9.73996        |
| <b>4f09</b>    | <b>2</b> | -8.1            | -8.13877        | -8.13727        | -8.13669        | -8.13856        | -8.13868        | -8.13981        |
| <b>4gfm</b>    | <b>2</b> | -7.81           | -7.83044        | -7.82084        | -7.83062        | -7.83549        | -7.83215        | -7.83453        |
| <b>4jsz</b>    | <b>2</b> | -5.28           | -5.17107        | -5.15606        | -5.25978        | -5.12507        | -5.19935        | -5.14348        |
| <b>4k77</b>    | <b>2</b> | -8.14           | -8.13781        | -8.05314        | -8.21151        | -8.16446        | -8.14816        | -8.1801         |
| <b>4kzq</b>    | <b>2</b> | -11.11          | -11.1449        | -11.1445        | -11.1409        | -11.1432        | -11.1319        | -11.1411        |
| <b>4mme</b>    | <b>2</b> | -10.3           | -10.2632        | -10.2651        | -10.2629        | -10.2674        | -10.2644        | -10.2654        |
| <b>4owm</b>    | <b>2</b> | -5.4            | -5.3701         | -5.34065        | -5.38479        | -5.38417        | -5.37965        | -5.36773        |
| <b>4u4s</b>    | <b>2</b> | -6.3            | -6.22296        | -6.21874        | -6.28802        | -6.28241        | -6.28347        | -6.24           |
| <b>Average</b> |          | <b>-8.12696</b> | <b>-8.09048</b> | <b>-8.02169</b> | <b>-8.1695</b>  | <b>-8.13509</b> | <b>-8.11532</b> | <b>-8.13282</b> |
| <hr/>          |          |                 |                 |                 |                 |                 |                 |                 |
| <b>1e66</b>    | <b>3</b> | -12.1           | -12.121         | -12.1181        | -12.1179        | -12.1185        | -12.1176        | -12.1187        |
| <b>1gpk</b>    | <b>3</b> | -9.9            | -9.92557        | -9.92391        | -9.924          | -9.92458        | -9.92432        | -9.924          |
| <b>1qkt</b>    | <b>3</b> | -10.4           | -10.353         | -10.353         | -10.3533        | -10.3525        | -10.3519        | -10.353         |
| <b>1uto</b>    | <b>3</b> | -4.6            | -4.54623        | -4.49948        | -4.57161        | -4.56247        | -4.56223        | -4.5736         |
| <b>1ydr</b>    | <b>3</b> | -8.19           | -8.15067        | -8.11365        | -8.15346        | -8.1543         | -8.15287        | -8.1519         |
| <b>2pog</b>    | <b>3</b> | -10.3           | -10.2654        | -10.2662        | -10.2655        | -10.2658        | -10.265         | -10.2651        |
| <b>2wer</b>    | <b>3</b> | -8.8            | -8.7669         | -8.7669         | -8.7692         | -8.7669         | -8.76702        | -8.76695        |
| <b>3acw</b>    | <b>3</b> | -10.95          | -10.9425        | -10.9472        | -10.9491        | -10.9403        | -10.9446        | -10.9504        |
| <b>3ao4</b>    | <b>3</b> | -7.45           | -7.30944        | -7.13426        | -7.44897        | -7.43175        | -7.43742        | -7.36924        |
| <b>3bgz</b>    | <b>3</b> | -10.9           | -10.9225        | -10.9203        | -10.9218        | -10.9206        | -10.9234        | -10.9228        |
| <b>3g31</b>    | <b>3</b> | -5              | -4.71843        | -4.73352        | -4.96841        | -4.9662         | -4.86076        | -4.91351        |
| <b>3gy4</b>    | <b>3</b> | -6.13           | -6.05207        | -6.05336        | -6.28246        | -6.07903        | -6.05776        | -6.0551         |
| <b>3kgp</b>    | <b>3</b> | -5.7            | -5.74779        | -5.73657        | -5.75245        | -5.74974        | -5.73044        | -5.72357        |
| <b>3pyy</b>    | <b>3</b> | -9.1            | -9.12769        | -9.00722        | -9.13391        | -9.01559        | -9.12447        | -9.1197         |
| <b>3wtj</b>    | <b>3</b> | -7              | -6.95947        | -6.94649        | -7.00029        | -6.98699        | -6.85266        | -6.974          |
| <b>4cr9</b>    | <b>3</b> | -6.7            | -6.70902        | -6.67282        | -6.69373        | -6.71108        | -6.66646        | -6.70688        |
| <b>4de1</b>    | <b>3</b> | -8.38           | -7.68563        | -7.26008        | -8.39775        | -7.89639        | -8.01829        | -7.98866        |
| <b>4de3</b>    | <b>3</b> | -8.51           | -8.58176        | -8.1759         | -8.48106        | -8.61127        | -8.41018        | -8.43118        |
| <b>4e6q</b>    | <b>3</b> | -9.8            | -9.76467        | -9.75671        | -9.80233        | -9.79333        | -9.78109        | -9.78558        |
| <b>4ih5</b>    | <b>3</b> | -6.8            | -6.43544        | -6.47873        | -6.74163        | -6.55033        | -6.53598        | -6.60411        |

|                |          |                 |                 |                 |                 |                 |                 |                 |
|----------------|----------|-----------------|-----------------|-----------------|-----------------|-----------------|-----------------|-----------------|
| <b>4j21</b>    | <b>3</b> | -11.6           | -11.5588        | -11.5593        | -11.5591        | -11.5585        | -11.5573        | -11.5591        |
| <b>4llx</b>    | <b>3</b> | -4.99           | -5.07883        | -5.06882        | -5.16545        | -5.10303        | -5.08622        | -5.09951        |
| <b>4m0y</b>    | <b>3</b> | -9.3            | -9.0704         | -8.7842         | -9.33128        | -9.32491        | -9.23531        | -9.15163        |
| <b>5c28</b>    | <b>3</b> | -6.2            | -6.00667        | -6.02266        | -6.18457        | -6.1842         | -6.13085        | -6.18666        |
| <b>Average</b> |          | <b>-8.28333</b> | <b>-8.19999</b> | <b>-8.13747</b> | <b>-8.29038</b> | <b>-8.24868</b> | <b>-8.22892</b> | <b>-8.23728</b> |
| <b>1q8u</b>    | <b>4</b> | -8.4            | -8.36952        | -8.36944        | -8.36887        | -8.36832        | -8.37007        | -8.3687         |
| <b>1syi</b>    | <b>4</b> | -9.1            | -9.12155        | -9.12203        | -9.12595        | -9.12655        | -9.12263        | -9.1268         |
| <b>2al5</b>    | <b>4</b> | -8.88           | -8.9164         | -8.91663        | -8.9145         | -8.91715        | -8.91995        | -8.91633        |
| <b>2cbv</b>    | <b>4</b> | -7.13           | -7.04962        | -7.13332        | -7.20412        | -7.20493        | -7.13252        | -7.1341         |
| <b>2hb1</b>    | <b>4</b> | -6.39           | -6.04744        | -5.51219        | -6.35967        | -6.28005        | -6.35918        | -6.3261         |
| <b>2j7h</b>    | <b>4</b> | -6.2            | -6.19865        | -6.12374        | -6.20177        | -6.20203        | -6.20106        | -6.19856        |
| <b>2v00</b>    | <b>4</b> | -7.8            | -7.77035        | -7.53086        | -7.78857        | -7.78033        | -7.78299        | -7.63238        |
| <b>2wnc</b>    | <b>4</b> | -8.3            | -8.31595        | -8.24443        | -8.29199        | -8.29072        | -8.29627        | -8.31868        |
| <b>2wtv</b>    | <b>4</b> | -11.6           | -11.6002        | -11.5914        | -11.6086        | -11.5952        | -11.5981        | -11.6015        |
| <b>2ymd</b>    | <b>4</b> | -7.28           | -7.447          | -7.44726        | -7.44487        | -7.44664        | -7.44813        | -7.43972        |
| <b>3b27</b>    | <b>4</b> | -6.9            | -6.92359        | -6.83008        | -6.92074        | -6.92377        | -6.9218         | -6.9212         |
| <b>3dx1</b>    | <b>4</b> | -6.8            | -6.46587        | -6.58486        | -6.76469        | -6.76519        | -6.67473        | -6.76539        |
| <b>3f3a</b>    | <b>4</b> | -8.09           | -8.05785        | -7.97932        | -8.06144        | -8.06771        | -8.05858        | -8.06021        |
| <b>3f3c</b>    | <b>4</b> | -7.9            | -7.93822        | -7.93821        | -7.94406        | -7.93732        | -7.94015        | -7.93776        |
| <b>3g0w</b>    | <b>4</b> | -10.9           | -10.8591        | -10.8609        | -10.8606        | -10.8601        | -10.8627        | -10.8622        |
| <b>3gr2</b>    | <b>4</b> | -5.9            | -5.6737         | -5.68184        | -5.88767        | -5.8108         | -5.78098        | -5.73078        |
| <b>3lka</b>    | <b>4</b> | -6.7            | -6.62651        | -6.65382        | -6.72338        | -6.74076        | -6.7364         | -6.69093        |
| <b>3n7a</b>    | <b>4</b> | -7.52           | -7.56905        | -7.5723         | -7.5655         | -7.5887         | -7.56554        | -7.57401        |
| <b>3qqs</b>    | <b>4</b> | -8.66           | -8.58994        | -8.59781        | -8.66239        | -8.591          | -8.6465         | -8.57492        |
| <b>3rr4</b>    | <b>4</b> | -8.1            | -7.9968         | -7.64063        | -8.07222        | -8.09455        | -8.10659        | -8.10022        |
| <b>3u8k</b>    | <b>4</b> | -7.1            | -7.06323        | -7.05988        | -7.06115        | -7.06479        | -7.06662        | -7.06609        |
| <b>3u8n</b>    | <b>4</b> | -7.41           | -7.41107        | -7.44145        | -7.43965        | -7.44079        | -7.44139        | -7.43621        |
| <b>4abg</b>    | <b>4</b> | -5.79           | -5.5877         | -5.51668        | -5.76142        | -5.6679         | -5.6694         | -5.66892        |
| <b>4ddh</b>    | <b>4</b> | -7.3            | -7.15163        | -7.05609        | -7.27309        | -7.23213        | -7.22529        | -7.22062        |
| <b>4dli</b>    | <b>4</b> | -10             | -10.0343        | -10.0347        | -10.0355        | -10.0372        | -10.0376        | -10.0332        |
| <b>4hge</b>    | <b>4</b> | -8.7            | -8.91181        | -8.73777        | -8.68858        | -8.68988        | -8.70169        | -8.83495        |
| <b>4ivb</b>    | <b>4</b> | -9.7            | -9.73716        | -9.73703        | -9.73767        | -9.73714        | -9.73724        | -9.73744        |
| <b>4j28</b>    | <b>4</b> | -7.3            | -7.29096        | -7.2609         | -7.28704        | -7.29021        | -7.21993        | -7.29103        |
| <b>Average</b> |          | <b>-7.92321</b> | <b>-7.88304</b> | <b>-7.8277</b>  | <b>-7.93056</b> | <b>-7.91971</b> | <b>-7.91514</b> | <b>-7.91318</b> |
| <b>1nc3</b>    | <b>5</b> | -9.8            | -9.78649        | -9.78955        | -9.78907        | -9.78733        | -9.78737        | -9.78551        |
| <b>1o3f</b>    | <b>5</b> | -8.89           | -8.64203        | -7.94988        | -8.89972        | -8.88383        | -8.77963        | -8.86436        |
| <b>1oyt</b>    | <b>5</b> | -10.92          | -10.9491        | -10.9275        | -10.9442        | -10.9499        | -10.9469        | -10.9484        |
| <b>1p1n</b>    | <b>5</b> | -8.1            | -8.10344        | -8.09713        | -8.10207        | -8.09556        | -8.08923        | -8.09321        |
| <b>1p1q</b>    | <b>5</b> | -7.49           | -7.43261        | -7.3891         | -7.49853        | -7.48918        | -7.47788        | -7.47491        |
| <b>1ps3</b>    | <b>5</b> | -8.2            | -7.99013        | -8.19479        | -8.19505        | -8.19479        | -8.19553        | -8.19695        |
| <b>1q8t</b>    | <b>5</b> | -7.8            | -7.77236        | -7.71928        | -7.81643        | -7.77798        | -7.78384        | -7.79713        |
| <b>2r9w</b>    | <b>5</b> | -10.24          | -9.35382        | -8.7688         | -10.2573        | -9.82737        | -9.6752         | -9.64525        |
| <b>2wn9</b>    | <b>5</b> | -8.3            | -7.42704        | -7.44785        | -8.33629        | -7.7272         | -8.03733        | -8.03596        |
| <b>2xj7</b>    | <b>5</b> | -8.61           | -8.64526        | -8.64629        | -8.64618        | -8.64578        | -8.64752        | -8.64713        |
| <b>3d4z</b>    | <b>5</b> | -7.15           | -6.28014        | -6.5027         | -7.14562        | -7.16821        | -6.85787        | -7.14621        |
| <b>3d6q</b>    | <b>5</b> | -6.6            | -6.57576        | -6.1232         | -6.53028        | -6.58775        | -6.45726        | -6.63585        |
| <b>3dd0</b>    | <b>5</b> | -6.3            | -6.2298         | -5.92896        | -6.28692        | -6.28446        | -6.27871        | -6.27931        |
| <b>3fcq</b>    | <b>5</b> | -5.5            | -5.54807        | -5.47024        | -5.63951        | -5.62015        | -5.61545        | -5.60651        |
| <b>3fur</b>    | <b>5</b> | -11.31          | -11.5196        | -11.6039        | -11.6574        | -11.6649        | -11.6597        | -11.6597        |
| <b>3gbb</b>    | <b>5</b> | -9.43           | -9.45707        | -9.46941        | -9.4494         | -9.44801        | -9.42094        | -9.46752        |
| <b>3jvr</b>    | <b>5</b> | -7.69           | -7.20982        | -6.68433        | -7.69953        | -7.69929        | -7.57968        | -7.6832         |

|                |   |                 |                 |                 |                 |                 |                 |                 |
|----------------|---|-----------------|-----------------|-----------------|-----------------|-----------------|-----------------|-----------------|
| 3qgy           | 5 | -9.51           | -9.40725        | -9.27442        | -9.54179        | -9.51511        | -9.47585        | -9.52262        |
| 3rlr           | 5 | -8.9            | -8.58633        | -8.74304        | -8.87756        | -8.87481        | -8.75266        | -8.867          |
| 3ryj           | 5 | -7.3            | -7.25446        | -7.18163        | -7.2816         | -7.2313         | -7.27255        | -7.24871        |
| 3uuo           | 5 | -7.71           | -7.74798        | -7.74179        | -7.74851        | -7.74582        | -7.73714        | -7.74563        |
| 4e5w           | 5 | -10.1           | -9.80644        | -9.76004        | -10.0812        | -10.0838        | -10.0808        | -10.0793        |
| 4f9w           | 5 | -10             | -9.8464         | -9.774          | -9.97033        | -9.9744         | -9.87054        | -9.97852        |
| 4gkm           | 5 | -8.4            | -8.40208        | -8.5217         | -8.40451        | -8.46939        | -8.43613        | -8.4588         |
| 4ih7           | 5 | -7              | -6.97604        | -6.98075        | -6.97559        | -6.97373        | -6.97704        | -6.97334        |
| 4ivc           | 5 | -9.7            | -9.71705        | -9.67261        | -9.72137        | -9.71971        | -9.71649        | -9.71777        |
| 4k18           | 5 | -10.8           | -10.5182        | -10.5216        | -10.8264        | -10.8281        | -10.7022        | -10.7513        |
| 4kz6           | 5 | -5.7            | -5.60171        | -5.36857        | -5.74245        | -5.63413        | -5.65212        | -5.68613        |
| 4m0z           | 5 | -10.9           | -10.8914        | -10.8867        | -10.8836        | -10.8853        | -10.8847        | -10.8899        |
| 4mgd           | 5 | -8.61           | -8.59521        | -8.6026         | -8.63175        | -8.59509        | -8.6056         | -8.60029        |
| 4pcs           | 5 | -7.2            | -7.18022        | -7.1805         | -7.20298        | -7.17984        | -7.18893        | -7.18418        |
| 4qac           | 5 | -11.27          | -11.257         | -11.2583        | -11.255         | -11.2549        | -11.2515        | -11.258         |
| 5aba           | 5 | -6              | -5.50487        | -5.63886        | -6.05027        | -5.90943        | -6.05498        | -6.03658        |
| <b>Average</b> |   | <b>-8.52818</b> | <b>-8.37016</b> | <b>-8.29758</b> | <b>-8.54813</b> | <b>-8.50686</b> | <b>-8.48331</b> | <b>-8.5141</b>  |
|                |   |                 |                 |                 |                 |                 |                 |                 |
| 1owh           | 6 | -14             | -13.9689        | -13.9809        | -13.9819        | -13.9716        | -8.20316        | -13.9798        |
| 1pxn           | 6 | -8.4            | -8.28315        | -8.15497        | -8.39977        | -8.35793        | -8.84503        | -8.29865        |
| 1w4o           | 6 | -8.8            | -8.82301        | -8.79289        | -8.84449        | -8.83753        | -6.68985        | -8.84237        |
| 2brb           | 6 | -6.7            | -6.66241        | -6.64869        | -6.66858        | -6.68248        | -8.12552        | -6.68962        |
| 2c3i           | 6 | -8.19           | -8.1316         | -8.04439        | -8.19753        | -8.0966         | -8.90511        | -8.14736        |
| 2j78           | 6 | -9              | -8.74204        | -8.74661        | -9.03127        | -8.91014        | -6.60524        | -8.92039        |
| 2p15           | 6 | -6.6            | -6.43966        | -6.27502        | -6.58394        | -6.58713        | -13.8019        | -6.61557        |
| 2qe4           | 6 | -13.8           | -13.8078        | -13.7999        | -13.8046        | -13.8003        | -9.74897        | -13.8044        |
| 2xnb           | 6 | -9.73           | -9.75173        | -9.75317        | -9.7535         | -9.75014        | -10.3112        | -9.75153        |
| 3dx2           | 6 | -10.36          | -10.1086        | -9.91056        | -10.3644        | -10.3269        | -6.7059         | -10.3393        |
| 3dxg           | 6 | -6.7            | -6.26076        | -5.84109        | -6.70755        | -6.61835        | -6.3781         | -6.59523        |
| 3e93           | 6 | -6.4            | -6.20367        | -6.11646        | -6.41952        | -6.34732        | -13.9824        | -6.36939        |
| 3ebp           | 6 | -9.7            | -9.67356        | -9.53204        | -9.67169        | -9.68303        | -9.68086        | -9.67528        |
| 3f3d           | 6 | -5.8            | -5.72966        | -5.75522        | -5.77437        | -5.77832        | -5.77343        | -5.77542        |
| 3f3e           | 6 | -6.3            | -6.28565        | -6.27669        | -6.30987        | -6.28849        | -6.31853        | -6.29449        |
| 3gc5           | 6 | -9.6            | -9.20643        | -9.34282        | -9.56467        | -9.51414        | -9.39069        | -9.56615        |
| 3k5v           | 6 | -9.9            | -9.59632        | -9.45976        | -9.92882        | -9.72818        | -9.74431        | -9.74361        |
| 3l7b           | 6 | -9              | -8.97908        | -8.98119        | -8.97765        | -8.97889        | -8.97916        | -8.9785         |
| 3r88           | 6 | -5.74           | -5.53506        | -5.47735        | -5.69035        | -5.63997        | -5.65395        | -5.62654        |
| 3syr           | 6 | -9.9            | -9.85903        | -9.873          | -9.85512        | -9.85572        | -9.85741        | -9.85799        |
| 3ui7           | 6 | -8.25           | -8.2445         | -8.20235        | -8.24405        | -8.24221        | -8.24405        | -8.24092        |
| 3uo4           | 6 | -10.51          | -9.85932        | -9.86061        | -10.6259        | -10.1595        | -10.1499        | -10.0668        |
| 4bkt           | 6 | -6.3            | -6.31962        | -6.32087        | -6.31832        | -6.3183         | -6.31804        | -6.31904        |
| 4ivd           | 6 | -9.2            | -8.80283        | -8.25284        | -9.23258        | -9.0287         | -9.08683        | -9.09033        |
| 4jxs           | 6 | -7.76           | -7.17632        | -6.77967        | -7.6696         | -7.59889        | -7.60131        | -7.51106        |
| 4rfm           | 6 | -11.28          | -11.3399        | -11.3128        | -11.2247        | -11.3107        | -11.3558        | -11.316         |
| 4twp           | 6 | -10.22          | -10.3481        | -10.0938        | -10.2065        | -10.19          | -10.2094        | -10.1525        |
| 5dwr           | 6 | -10.8           | -10.7518        | -10.8365        | -10.8357        | -10.8365        | -10.7493        | -10.8365        |
| <b>Average</b> |   | <b>-8.89071</b> | <b>-8.74609</b> | <b>-8.65794</b> | <b>-8.88882</b> | <b>-8.83707</b> | <b>-8.83626</b> | <b>-8.83588</b> |
|                |   |                 |                 |                 |                 |                 |                 |                 |
| 1nc1           | 7 | -11.9           | -11.9089        | -11.9087        | -11.9061        | -11.9077        | -8.32361        | -11.9095        |
| 1y6r           | 7 | -8.3            | -8.32621        | -8.32028        | -8.3265         | -8.32337        | -9.66642        | -8.32543        |
| 1yc1           | 7 | -9.7            | -9.65148        | -9.64567        | -9.66855        | -9.66789        | -9.81279        | -9.66953        |
| 1z9g           | 7 | -9.8            | -9.81272        | -9.8081         | -9.81302        | -9.82651        | -6.14816        | -9.80513        |
| 2fvd           | 7 | -6.49           | -6.06435        | -5.8485         | -6.61097        | -6.1458         | -8.93241        | -6.10223        |

|                |          |                 |                 |                 |                 |                 |                 |                 |
|----------------|----------|-----------------|-----------------|-----------------|-----------------|-----------------|-----------------|-----------------|
| 2vvn           | 7        | -9.6            | -8.69969        | -8.64405        | -9.06458        | -8.91618        | -7.0978         | -9.00642        |
| 2w66           | 7        | -7.11           | -6.99337        | -6.86672        | -7.10967        | -7.10615        | -7.82905        | -7.10472        |
| 2wvt           | 7        | -7.8            | -7.6917         | -7.83118        | -7.83266        | -7.83004        | -6.25206        | -7.82426        |
| 2x00           | 7        | -6.3            | -6.25409        | -6.1475         | -6.30989        | -6.30046        | -11.9487        | -6.28582        |
| 2xbv           | 7        | -11.94          | -11.9485        | -11.9518        | -11.9509        | -11.9483        | -11.4615        | -11.9492        |
| 2xii           | 7        | -11.55          | -11.1617        | -9.49142        | -11.4898        | -10.9771        | -10.0228        | -11.4661        |
| 2zb1           | 7        | -10             | -8.40651        | -8.87047        | -10.0237        | -9.78651        | -10.654         | -10.023         |
| 3b65           | 7        | -10.69          | -10.6446        | -10.5276        | -10.6534        | -10.6595        | -10.817         | -10.6463        |
| 3cj4           | 7        | -10.9           | -10.8232        | -10.8453        | -10.9075        | -10.8695        | -7.39012        | -10.8391        |
| 3e92           | 7        | -7.4            | -7.37826        | -7.07853        | -7.39488        | -7.38146        | -11.9082        | -7.39117        |
| 3ehy           | 7        | -7.1            | -7.02351        | -6.95772        | -7.0808         | -7.03771        | -7.05969        | -7.08407        |
| 3fv2           | 7        | -10             | -9.97594        | -9.97331        | -9.97726        | -9.97733        | -9.97922        | -9.97833        |
| 3g2n           | 7        | -9.39           | -9.34365        | -9.33366        | -9.35281        | -9.35382        | -9.35264        | -9.35261        |
| 3nq9           | 7        | -4.69           | -4.63875        | -4.50094        | -4.98555        | -4.74939        | -4.80566        | -4.71219        |
| 3up2           | 7        | -9.59           | -9.36241        | -9.31718        | -9.5815         | -9.57333        | -9.27174        | -9.62407        |
| 4ciw           | 7        | -8.3            | -8.27404        | -8.27143        | -8.26979        | -8.27202        | -8.27137        | -8.27477        |
| 4de2           | 7        | -8.01           | -7.81825        | -7.28965        | -7.99573        | -7.68162        | -7.81952        | -7.95532        |
| 4dju           | 7        | -9.6            | -9.58869        | -9.23744        | -9.59389        | -9.60469        | -9.58446        | -9.59814        |
| 4eor           | 7        | -9.3            | -9.15954        | -9.13632        | -9.28007        | -9.23989        | -9.26765        | -9.24793        |
| 4f2w           | 7        | -9.1            | -9.07128        | -9.07518        | -9.07611        | -9.07319        | -9.06873        | -9.06942        |
| 4j3l           | 7        | -11.1           | -11.0828        | -10.8813        | -11.1287        | -11.1203        | -11.111         | -11.1181        |
| 4jfs           | 7        | -6.7            | -6.66885        | -6.69355        | -6.67019        | -6.67331        | -6.67491        | -6.67124        |
| 4jia           | 7        | -8.96           | -8.8085         | -8.82962        | -8.98562        | -8.88692        | -8.80071        | -8.79059        |
| 4lzs           | 7        | -5.6            | -5.55197        | -5.62659        | -5.57974        | -5.57877        | -5.58377        | -5.58312        |
| <b>Average</b> |          | <b>-8.85931</b> | <b>-8.69425</b> | <b>-8.58309</b> | <b>-8.84896</b> | <b>-8.77479</b> | <b>-8.7902</b>  | <b>-8.80717</b> |
| <b>1bzc</b>    | <b>8</b> | <b>-9.58</b>    | <b>-9.2907</b>  | <b>-9.29824</b> | <b>-9.57493</b> | <b>-9.54229</b> | <b>-9.48724</b> | <b>-9.57632</b> |
| <b>1sqa</b>    | <b>8</b> | <b>-9.15</b>    | <b>-9.0641</b>  | <b>-8.64812</b> | <b>-9.08128</b> | <b>-8.96849</b> | <b>-9.02452</b> | <b>-9.08259</b> |
| <b>1ydt</b>    | <b>8</b> | <b>-9.43</b>    | <b>-8.83232</b> | <b>-8.83935</b> | <b>-9.41968</b> | <b>-8.99485</b> | <b>-8.94906</b> | <b>-9.07899</b> |
| <b>1z95</b>    | <b>8</b> | <b>-10.51</b>   | <b>-10.5322</b> | <b>-10.5595</b> | <b>-10.5019</b> | <b>-10.5082</b> | <b>-10.515</b>  | <b>-10.545</b>  |
| <b>2br1</b>    | <b>8</b> | <b>-8.39</b>    | <b>-8.34049</b> | <b>-8.21989</b> | <b>-8.35607</b> | <b>-8.32121</b> | <b>-8.30419</b> | <b>-8.32804</b> |
| <b>2cet</b>    | <b>8</b> | <b>-9.3</b>     | <b>-8.99499</b> | <b>-8.61572</b> | <b>-9.28684</b> | <b>-9.02257</b> | <b>-8.97075</b> | <b>-9.12994</b> |
| <b>2qbr</b>    | <b>8</b> | <b>-8.43</b>    | <b>-7.55862</b> | <b>-7.27058</b> | <b>-8.36568</b> | <b>-7.90792</b> | <b>-7.93207</b> | <b>-7.83601</b> |
| <b>2v7a</b>    | <b>8</b> | <b>-9.79</b>    | <b>-9.71359</b> | <b>-9.69033</b> | <b>-9.76812</b> | <b>-9.76112</b> | <b>-9.75336</b> | <b>-9.74856</b> |
| <b>2w4x</b>    | <b>8</b> | <b>-7.3</b>     | <b>-6.86745</b> | <b>-6.45385</b> | <b>-7.30803</b> | <b>-7.30817</b> | <b>-7.31154</b> | <b>-7.30589</b> |
| <b>2xb8</b>    | <b>8</b> | <b>-10.8</b>    | <b>-10.7797</b> | <b>-10.7737</b> | <b>-10.7783</b> | <b>-10.777</b>  | <b>-10.7811</b> | <b>-10.7749</b> |
| <b>2xdl</b>    | <b>8</b> | <b>-6.1</b>     | <b>-6.08654</b> | <b>-6.07731</b> | <b>-6.08684</b> | <b>-6.08565</b> | <b>-6.08682</b> | <b>-6.09063</b> |
| <b>2zcg</b>    | <b>8</b> | <b>-9.64</b>    | <b>-9.4346</b>  | <b>-9.3216</b>  | <b>-9.63721</b> | <b>-9.4555</b>  | <b>-9.45424</b> | <b>-9.48936</b> |
| <b>2zy1</b>    | <b>8</b> | <b>-9.67</b>    | <b>-9.38045</b> | <b>-9.19475</b> | <b>-9.55818</b> | <b>-9.38109</b> | <b>-9.42659</b> | <b>-9.4942</b>  |
| <b>3aru</b>    | <b>8</b> | <b>-6.07</b>    | <b>-5.85683</b> | <b>-5.7791</b>  | <b>-6.09739</b> | <b>-6.01568</b> | <b>-6.0345</b>  | <b>-6.02492</b> |
| <b>3b5r</b>    | <b>8</b> | <b>-11.28</b>   | <b>-11.3151</b> | <b>-11.2912</b> | <b>-11.2662</b> | <b>-11.2913</b> | <b>-11.2999</b> | <b>-11.2608</b> |
| <b>3fv1</b>    | <b>8</b> | <b>-9.84</b>    | <b>-9.84893</b> | <b>-9.84318</b> | <b>-9.85249</b> | <b>-9.8458</b>  | <b>-9.84147</b> | <b>-9.84296</b> |
| <b>3ge7</b>    | <b>8</b> | <b>-10.5</b>    | <b>-10.3866</b> | <b>-10.2807</b> | <b>-10.5298</b> | <b>-10.5195</b> | <b>-10.1626</b> | <b>-10.4983</b> |
| <b>3ivg</b>    | <b>8</b> | <b>-10.1</b>    | <b>-9.95919</b> | <b>-9.6844</b>  | <b>-10.0997</b> | <b>-10.0081</b> | <b>-10.0418</b> | <b>-10.057</b>  |
| <b>3jvs</b>    | <b>8</b> | <b>-8</b>       | <b>-8.02084</b> | <b>-7.88946</b> | <b>-8.01151</b> | <b>-8.0165</b>  | <b>-8.00813</b> | <b>-8.01404</b> |
| <b>3mss</b>    | <b>8</b> | <b>-7.2</b>     | <b>-6.95259</b> | <b>-6.47069</b> | <b>-7.17694</b> | <b>-6.9617</b>  | <b>-6.93524</b> | <b>-6.98138</b> |
| <b>3n76</b>    | <b>8</b> | <b>-11.49</b>   | <b>-11.3717</b> | <b>-11.3832</b> | <b>-11.4215</b> | <b>-11.3931</b> | <b>-11.4035</b> | <b>-11.3967</b> |
| <b>3n86</b>    | <b>8</b> | <b>-12</b>      | <b>-11.9754</b> | <b>-11.9784</b> | <b>-12.0098</b> | <b>-12.0059</b> | <b>-12.0104</b> | <b>-12.0035</b> |
| <b>3p5o</b>    | <b>8</b> | <b>-8.8</b>     | <b>-8.81417</b> | <b>-8.61884</b> | <b>-8.81687</b> | <b>-8.81087</b> | <b>-8.8114</b>  | <b>-8.81078</b> |
| <b>4dld</b>    | <b>8</b> | <b>-8.33</b>    | <b>-8.10177</b> | <b>-7.99923</b> | <b>-8.37988</b> | <b>-8.41964</b> | <b>-8.46283</b> | <b>-8.40664</b> |
| <b>4qd6</b>    | <b>8</b> | <b>-8.5</b>     | <b>-7.60143</b> | <b>-7.32223</b> | <b>-8.38858</b> | <b>-7.93403</b> | <b>-8.00245</b> | <b>-7.91897</b> |
| <b>4wiv</b>    | <b>8</b> | <b>-7.52</b>    | <b>-7.49565</b> | <b>-7.40844</b> | <b>-7.55207</b> | <b>-7.54843</b> | <b>-7.54801</b> | <b>-7.53493</b> |
| <b>Average</b> |          | <b>-9.14308</b> | <b>-8.94523</b> | <b>-8.80431</b> | <b>-9.12791</b> | <b>-9.03095</b> | <b>-9.02149</b> | <b>-9.04736</b> |

|                |           |                 |                 |                 |                 |                 |                 |                 |
|----------------|-----------|-----------------|-----------------|-----------------|-----------------|-----------------|-----------------|-----------------|
| <b>1k1i</b>    | <b>9</b>  | -9.4            | -8.85392        | -6.81535        | -9.42281        | -9.33207        | -9.25385        | -9.21668        |
| <b>1mq6</b>    | <b>9</b>  | -9.1            | -7.97378        | -7.56691        | -9.10487        | -8.79442        | -8.27328        | -9.18112        |
| <b>1nvq</b>    | <b>9</b>  | -11             | -10.5388        | -10.6745        | -11.0075        | -10.9777        | -10.9583        | -10.9957        |
| <b>1o0h</b>    | <b>9</b>  | -7.38           | -6.68022        | -6.48533        | -7.3113         | -7.06881        | -6.88655        | -7.07213        |
| <b>2y5h</b>    | <b>9</b>  | -8.07           | -7.08436        | -6.78019        | -8.02842        | -7.84423        | -7.8312         | -7.91711        |
| <b>2zda</b>    | <b>9</b>  | -9.8            | -9.71974        | -9.02435        | -9.79805        | -9.7812         | -9.78372        | -9.8035         |
| <b>3e5a</b>    | <b>9</b>  | -9.29           | -9.2561         | -8.79544        | -9.30544        | -9.29906        | -9.33739        | -9.33466        |
| <b>3gnw</b>    | <b>9</b>  | -11.9           | -11.5128        | -10.834         | -11.863         | -11.8669        | -11.8609        | -11.8696        |
| <b>3u9q</b>    | <b>9</b>  | -5.97           | -5.75348        | -5.65895        | -6.00385        | -5.87555        | -5.87686        | -5.84438        |
| <b>3wz8</b>    | <b>9</b>  | -9.67           | -9.52732        | -8.84898        | -9.61244        | -9.5107         | -9.51965        | -9.60745        |
| <b>4cra</b>    | <b>9</b>  | -10.01          | -9.78162        | -9.35427        | -10.0355        | -9.93149        | -10.0466        | -9.95451        |
| <b>4crc</b>    | <b>9</b>  | -10.28          | -10.098         | -9.1046         | -10.1858        | -10.2842        | -10.2022        | -10.1981        |
| <b>4f3c</b>    | <b>9</b>  | -9.23           | -9.51842        | -9.525          | -9.53531        | -9.56602        | -9.55466        | -9.54251        |
| <b>4ty7</b>    | <b>9</b>  | -9.89           | -8.74073        | -8.65331        | -9.87669        | -9.72367        | -9.79534        | -9.91904        |
| <b>4w9i</b>    | <b>9</b>  | -8.21           | -8.03223        | -7.28034        | -8.28248        | -8.23749        | -8.26265        | -8.26237        |
| <b>4x6p</b>    | <b>9</b>  | -10.97          | -9.61853        | -8.98706        | -10.4523        | -10.7627        | -10.6461        | -10.944         |
| <b>Average</b> |           | <b>-9.38563</b> | <b>-8.91813</b> | <b>-8.39929</b> | <b>-9.36412</b> | <b>-9.30351</b> | <b>-9.25558</b> | <b>-9.35393</b> |
| <b>1z6e</b>    | <b>10</b> | -10.6           | -9.20324        | -7.75206        | -10.1546        | -10.5722        | -10.5749        | -10.5601        |
| <b>2qbp</b>    | <b>10</b> | -9.24           | -7.65925        | -7.30091        | -9.30579        | -8.8589         | -8.92089        | -9.04894        |
| <b>2qnq</b>    | <b>10</b> | -10.3           | -10.3253        | -10.0307        | -10.3252        | -10.3267        | -10.3241        | -10.3244        |
| <b>3arq</b>    | <b>10</b> | -10.68          | -10.1466        | -10.2676        | -10.6827        | -10.5164        | -10.5806        | -10.6021        |
| <b>3ejr</b>    | <b>10</b> | -8.48           | -7.0598         | -7.24718        | -8.51997        | -8.0984         | -8.45703        | -8.32564        |
| <b>3nx7</b>    | <b>10</b> | -6.96           | -6.67223        | -6.49396        | -6.93889        | -6.71907        | -6.67865        | -6.62326        |
| <b>3oe4</b>    | <b>10</b> | -10.6           | -7.41483        | -8.37713        | -10.5914        | -10.1405        | -9.67159        | -10.5822        |
| <b>3ozt</b>    | <b>10</b> | -10.7           | -9.03406        | -9.73413        | -10.7121        | -10.701         | -10.6917        | -10.6477        |
| <b>3zdg</b>    | <b>10</b> | -5.2            | -5.15984        | -5.17233        | -5.16467        | -5.16752        | -5.16674        | -5.16258        |
| <b>3zsx</b>    | <b>10</b> | -7.78           | -7.37424        | -7.01964        | -8.04837        | -7.97284        | -7.98541        | -7.95364        |
| <b>4w9c</b>    | <b>10</b> | -7.4            | -6.9232         | -6.08717        | -7.22885        | -7.33915        | -7.33109        | -7.32643        |
| <b>Average</b> |           | <b>-8.90364</b> | <b>-7.9066</b>  | <b>-7.77116</b> | <b>-8.87932</b> | <b>-8.76479</b> | <b>-8.76207</b> | <b>-8.83246</b> |
| <b>1vso</b>    | <b>11</b> | -6.83           | -6.49424        | -6.27043        | -6.82853        | -6.81649        | -6.8015         | -6.81779        |
| <b>2qbq</b>    | <b>11</b> | -7.71           | -5.81964        | -6.00045        | -7.665          | -7.11274        | -6.93276        | -6.99714        |
| <b>2vw5</b>    | <b>11</b> | -8.52           | -9.03236        | -9.02774        | -9.0388         | -9.03494        | -9.03168        | -9.03229        |
| <b>2wca</b>    | <b>11</b> | -8.3            | -7.94507        | -7.72154        | -8.30983        | -7.97531        | -8.01828        | -7.99725        |
| <b>2yfe</b>    | <b>11</b> | -7.4            | -7.40348        | -7.36367        | -7.41197        | -7.40634        | -7.41654        | -7.42215        |
| <b>2zcr</b>    | <b>11</b> | -10.08          | -10.042         | -10.0137        | -10.1162        | -10.0687        | -10.0388        | -10.0696        |
| <b>3b68</b>    | <b>11</b> | -11.11          | -11.1739        | -11.1763        | -11.1547        | -11.1373        | -11.1567        | -11.1745        |
| <b>3nw9</b>    | <b>11</b> | -11.71          | -9.68882        | -8.85172        | -11.7335        | -11.6681        | -11.1698        | -11.5934        |
| <b>3oe5</b>    | <b>11</b> | -10.1           | -8.36979        | -7.31581        | -10.1272        | -9.94567        | -9.83182        | -9.89957        |
| <b>3ozs</b>    | <b>11</b> | -10.45          | -8.69378        | -9.4264         | -10.4692        | -10.0958        | -10.4289        | -10.0943        |
| <b>3ueu</b>    | <b>11</b> | -6.32           | -6.11882        | -6.0824         | -6.36681        | -6.22647        | -6.26598        | -6.16176        |
| <b>4agn</b>    | <b>11</b> | -6              | -5.02144        | -5.04407        | -5.98785        | -6.08385        | -5.94725        | -6.09683        |
| <b>4eky</b>    | <b>11</b> | -9.84           | -9.84582        | -9.80156        | -9.85035        | -9.82884        | -9.84125        | -9.83885        |
| <b>5c2h</b>    | <b>11</b> | -9.62           | -9.06946        | -8.52899        | -9.63074        | -9.49423        | -8.92977        | -9.52976        |
| <b>Average</b> |           | <b>-8.85643</b> | <b>-8.19418</b> | <b>-8.04463</b> | <b>-8.90648</b> | <b>-8.77819</b> | <b>-8.70079</b> | <b>-8.76608</b> |
| <b>2p4y</b>    | <b>12</b> | -10.86          | -10.9665        | -10.9187        | -10.9601        | -10.9616        | -10.9714        | -10.9749        |
| <b>2wbg</b>    | <b>12</b> | -8.4            | -7.6839         | -8.10459        | -8.31501        | -8.25317        | -8.11246        | -8.2302         |
| <b>3b1m</b>    | <b>12</b> | -10.12          | -10.0933        | -10.1135        | -10.1354        | -10.0494        | -10.0682        | -10.0471        |
| <b>4agp</b>    | <b>12</b> | -6.45           | -5.29371        | -5.07565        | -6.30767        | -6.4237         | -6.20686        | -6.50062        |
| <b>4agq</b>    | <b>12</b> | -6.68           | -5.47185        | -4.62657        | -6.64214        | -6.32203        | -6.11708        | -6.50358        |

|                |    |                 |                 |                 |                 |                 |                 |                 |
|----------------|----|-----------------|-----------------|-----------------|-----------------|-----------------|-----------------|-----------------|
| 4ea2           | 12 | -8.2            | -7.97538        | -7.96891        | -8.15826        | -8.03259        | -7.99677        | -8.04525        |
| 4eo8           | 12 | -6.99           | -6.92441        | -6.69272        | -6.95176        | -6.9387         | -6.92393        | -6.94616        |
| <b>Average</b> |    | <b>-8.24286</b> | <b>-7.77273</b> | <b>-7.64295</b> | <b>-8.21004</b> | <b>-8.14016</b> | <b>-8.05668</b> | <b>-8.17825</b> |
|                |    |                 |                 |                 |                 |                 |                 |                 |
| 1h22           | 13 | -11.39          | -9.79514        | -9.635          | -10.8456        | -10.2096        | -10.354         | -10.6153        |
| 2fxs           | 13 | -6.7            | -6.2299         | -5.8013         | -6.62736        | -6.60545        | -6.497          | -6.59784        |
| 2yge           | 13 | -8.41           | -8.43032        | -7.90143        | -8.43361        | -8.43749        | -8.43458        | -8.4343         |
| 3coz           | 13 | -10             | -9.89936        | -9.86962        | -10.0044        | -10.0001        | -10.0186        | -10.005         |
| 3kwa           | 13 | -4.26           | -3.80517        | -3.87919        | -4.35523        | -3.99806        | -3.96974        | -4.00714        |
| 3myg           | 13 | -7.41           | -7.03088        | -6.63351        | -7.38454        | -7.30927        | -7.27886        | -7.3618         |
| 3uev           | 13 | -6.6            | -6.31487        | -6.32101        | -6.61006        | -6.41329        | -6.45805        | -6.48362        |
| 4cig           | 13 | -7.83           | -6.99577        | -6.77245        | -7.51099        | -7.1603         | -7.28241        | -7.42645        |
| 4w9h           | 13 | -8.08           | -7.73367        | -7.22236        | -8.10604        | -8.10042        | -8.05578        | -8.02256        |
| 5a7b           | 13 | -6.7            | -5.81691        | -5.81597        | -6.71368        | -6.44244        | -6.30951        | -6.67498        |
| <b>Average</b> |    | <b>-7.738</b>   | <b>-7.2052</b>  | <b>-6.98518</b> | <b>-7.65915</b> | <b>-7.46763</b> | <b>-7.46585</b> | <b>-7.56291</b> |
|                |    |                 |                 |                 |                 |                 |                 |                 |
| 1g2k           | 14 | -11.39          | -11.5277        | -11.5562        | -11.4263        | -11.4908        | -11.6164        | -11.5203        |
| 1lpg           | 14 | -9.3            | -8.21807        | -8.16114        | -9.11595        | -9.10283        | -8.67034        | -8.88857        |
| 1qf1           | 14 | -7.93           | -7.71902        | -7.09365        | -7.95866        | -7.94665        | -7.92483        | -7.93657        |
| 3coy           | 14 | -10             | -9.90927        | -9.73016        | -10.0212        | -10.0275        | -10.0198        | -10.0217        |
| 4gr0           | 14 | -11.69          | -10.7878        | -10.071         | -11.6767        | -11.0313        | -11.0962        | -11.1789        |
| <b>Average</b> |    | <b>-10.062</b>  | <b>-9.63236</b> | <b>-9.32242</b> | <b>-10.0398</b> | <b>-9.91982</b> | <b>-9.86551</b> | <b>-9.90921</b> |
|                |    |                 |                 |                 |                 |                 |                 |                 |
| 1a30           | 15 | -7.01           | -6.54055        | -6.39915        | -7.04512        | -6.84088        | -6.77916        | -6.80272        |
| 1h23           | 15 | -11.48          | -9.7268         | -9.59263        | -10.6875        | -10.2248        | -10.5517        | -10.4025        |
| 3arp           | 15 | -9.64           | -8.44224        | -8.72367        | -9.1385         | -8.94367        | -8.91916        | -8.92076        |
| 3tsk           | 15 | -10.34          | -8.86927        | -9.18783        | -10.3676        | -9.54804        | -9.18355        | -9.68072        |
| 3uew           | 15 | -6.66           | -6.26372        | -6.04818        | -6.69985        | -6.37838        | -6.40299        | -6.39766        |
| 3zso           | 15 | -8.23           | -7.1262         | -6.68517        | -7.67393        | -8.1374         | -7.80252        | -8.02277        |
| 4ogj           | 15 | -7.5            | -6.39964        | -6.44449        | -7.32713        | -7.00069        | -6.73759        | -6.90363        |
| <b>Average</b> |    | <b>-8.69429</b> | <b>-7.62406</b> | <b>-7.58302</b> | <b>-8.41995</b> | <b>-8.15341</b> | <b>-8.05381</b> | <b>-8.16153</b> |
|                |    |                 |                 |                 |                 |                 |                 |                 |
| 1u1b           | 16 | -8.88           | -7.72403        | -7.43284        | -8.81483        | -8.35572        | -8.00758        | -8.10977        |
| 3bv9           | 16 | -8.45           | -8.20062        | -8.01275        | -8.4            | -8.34623        | -8.40646        | -8.26239        |
| 3utu           | 16 | -10.37          | -7.44688        | -7.20214        | -9.7956         | -8.70549        | -8.62518        | -8.87726        |
| <b>Average</b> |    | <b>-9.23333</b> | <b>-7.79051</b> | <b>-7.54924</b> | <b>-9.00348</b> | <b>-8.46915</b> | <b>-8.3464</b>  | <b>-8.41647</b> |
|                |    |                 |                 |                 |                 |                 |                 |                 |
| 1eby           | 17 | -12.3           | -12.2848        | -12.24          | -12.2887        | -12.288         | -12.2913        | -12.2916        |
| 3o9i           | 17 | -9.84           | -9.82637        | -9.73357        | -9.85004        | -9.85681        | -9.85151        | -9.84509        |
| 3pww           | 17 | -10.85          | -10.8149        | -10.4808        | -10.7887        | -10.8524        | -10.8248        | -10.8466        |
| 3uex           | 17 | -7.33           | -6.94527        | -6.81227        | -7.40078        | -7.05909        | -6.96191        | -6.97528        |
| 4tmn           | 17 | -7.99           | -7.37596        | -7.27097        | -8.6229         | -8.38573        | -8.1515         | -8.6337         |
| <b>Average</b> |    | <b>-9.662</b>   | <b>-9.44946</b> | <b>-9.30753</b> | <b>-9.79022</b> | <b>-9.6884</b>  | <b>-9.61621</b> | <b>-9.71845</b> |
|                |    |                 |                 |                 |                 |                 |                 |                 |
| 5tmn           | 18 | -8.59           | -7.32244        | -7.96168        | -8.89372        | -8.61936        | -8.67471        | -8.90335        |
| 4w9l           | 19 | -7.9            | -7.78076        | -7.61016        | -7.8647         | -7.91336        | -7.89053        | -7.89637        |
| 2vkm           | 20 | -11.37          | -11.1374        | -10.0048        | -11.3854        | -11.1913        | -11.1976        | -11.2348        |
| 4gid           | 23 | -10.71          | -11.0796        | -11.063         | -11.1764        | -11.1715        | -11.1616        | -11.1778        |
| 3prs           | 24 | -9.18           | -8.73614        | -8.62536        | -9.24632        | -9.20561        | -9.23789        | -9.22512        |
| 3uri           | 33 | -7.85           | -7.95376        | -7.15295        | -7.80549        | -7.77117        | -7.63163        | -7.75399        |
| 3ag9           | 36 | -7.99           | -5.19405        | -4.99338        | -6.45306        | -5.7326         | -5.38231        | -5.45766        |

**Note:** The pdb codes shown in Figure 4 are 3arv, 1q8t, 3nx7 and 3uew. Their ligands have different flexibilities, i.e., 1, 5, 10 and 15 torsions, respectively, which can make docking tests more representative. The visualization of 3arv pdb code is the Chitinase A as protein complexed with the crystallization and docking results of Sanguinarine ; The visualization of 1q8t pdb code is the cAMP-dependent Protein Kinase complexed with the crystallization and docking results of Rho-kinase Inhibitor Y-27632 ; The visualization of 3nx7 pdb code is the human MMP12 as target complexed with the crystallization and docking results of an acetamide inhibitor; The visualization of 3uew pdb code is the Bovine beta-lactoglobulin as protein complexed with the crystallization and docking results of palmitic acid.

**Table S2.** The average RMSD of 285 test cases obtained by all compared docking programs

|                |      | RMSD (Å)        |                 |                 |                 |                 |                 |                 |
|----------------|------|-----------------|-----------------|-----------------|-----------------|-----------------|-----------------|-----------------|
| PDB            | ntor | Vina            | PSO-c4          | PSOVina         | GWOVi           | MPSOVi          | MRDPS           | MRDPS           |
|                |      |                 |                 |                 | na              | na              | O-c4            | OVina           |
| 3jya           | 0    | 4.5286          | 4.53175         | 4.5888          | 4.5289          | 4.52926         | 4.52804         | 4.60274         |
| 3udh           | 0    | 0.21232         | 0.21152         | 0.21165         | 0.21206         | 0.21217         | 0.6142          | 0.21176         |
| 4kzu           | 0    | 0.19342         | 0.20145         | 0.21355         | 0.1999          | 0.21544         | 0.19727         | 0.20983         |
| <b>Average</b> |      | <b>1.64478</b>  | <b>1.64824</b>  | <b>1.671333</b> | <b>1.646953</b> | <b>1.65229</b>  | <b>1.779837</b> | <b>1.674777</b> |
| 1bcu           | 1    | 0.46117         | 0.46324         | 0.46162         | 0.46266         | 0.4612          | 0.4616          | 0.47236         |
| 1gpn           | 1    | 4.42468         | 4.42469         | 4.42467         | 4.42425         | 4.4247          | 4.42469         | 4.42471         |
| 2xys           | 1    | 0.44453         | 0.44803         | 0.44724         | 0.44783         | 0.4455          | 0.44917         | 0.44764         |
| 3arv           | 1    | 7.77882         | 7.04284         | 7.51012         | 7.06648         | 7.64433         | 7.66039         | 6.3522          |
| 3rsx           | 1    | 0.48803         | 1.07702         | 2.71351         | 1.07779         | 0.49574         | 1.07581         | 0.48978         |
| 4ddk           | 1    | 4.41807         | 4.39193         | 4.36039         | 4.83473         | 4.83086         | 4.39644         | 4.83018         |
| <b>Average</b> |      | <b>3.00255</b>  | <b>2.974625</b> | <b>3.319592</b> | <b>3.05229</b>  | <b>3.050388</b> | <b>3.078017</b> | <b>2.836145</b> |
| 1c5z           | 2    | 0.50284         | 0.37733         | 0.37781         | 1.13583         | 0.37799         | 0.50298         | 0.37607         |
| 1o5b           | 2    | 1.02205         | 0.91278         | 0.91278         | 1.02136         | 1.02191         | 1.02201         | 1.03729         |
| 1r5y           | 2    | 0.22276         | 1.65597         | 2.25378         | 0.22212         | 0.22247         | 0.22038         | 0.71413         |
| 1s38           | 2    | 0.13502         | 0.13807         | 1.29537         | 0.13908         | 0.13802         | 0.71392         | 0.13563         |
| 2iwx           | 2    | 0.5695          | 0.56945         | 0.5695          | 0.56938         | 0.56945         | 0.5694          | 0.56935         |
| 2weg           | 2    | 1.34197         | 1.45329         | 2.4006          | 1.34797         | 1.51445         | 1.902           | 1.51867         |
| 2yki           | 2    | 2.19573         | 0.23015         | 0.23846         | 0.25544         | 0.2423          | 0.23449         | 0.23954         |
| 3ary           | 2    | 5.2844          | 5.99158         | 5.69327         | 5.31545         | 5.54624         | 5.73446         | 6.19112         |
| 3g2z           | 2    | 4.96368         | 4.49492         | 4.52499         | 4.72888         | 4.8269          | 4.68976         | 4.47988         |
| 3gv9           | 2    | 4.37868         | 1.8957          | 3.65574         | 4.37988         | 4.00023         | 3.57804         | 4.11055         |
| 3kr8           | 2    | 0.90477         | 0.56432         | 0.55753         | 0.90524         | 0.68027         | 0.78753         | 0.73082         |
| 3pxf           | 2    | 9.46707         | 9.37744         | 9.28807         | 9.33637         | 9.34681         | 9.31641         | 9.42736         |
| 3twp           | 2    | 9.34878         | 6.53269         | 9.9334          | 9.33972         | 8.7688          | 8.84763         | 8.22884         |
| 3u5j           | 2    | 0.22816         | 0.2282          | 0.22822         | 0.22787         | 0.22817         | 0.81259         | 0.22829         |
| 3zt2           | 2    | 0.7128          | 0.48273         | 0.77787         | 0.71316         | 0.71283         | 0.67403         | 0.67331         |
| 4f09           | 2    | 0.24435         | 0.22987         | 0.23323         | 0.23613         | 0.23526         | 0.23174         | 0.22969         |
| 4gfm           | 2    | 6.4969          | 6.4643          | 6.49071         | 6.49886         | 6.48109         | 6.46374         | 6.521           |
| 4jsz           | 2    | 11.30485        | 11.28977        | 10.40552        | 11.31385        | 11.12875        | 11.18049        | 10.45838        |
| 4k77           | 2    | 3.0052          | 2.91859         | 3.55542         | 2.66295         | 2.94281         | 2.94238         | 2.82892         |
| 4kzq           | 2    | 0.22941         | 0.22959         | 0.41594         | 0.22928         | 0.23211         | 0.24092         | 0.23198         |
| 4mme           | 2    | 0.40994         | 0.42001         | 0.41552         | 0.41195         | 0.41404         | 0.4165          | 0.41555         |
| 4owm           | 2    | 2.87813         | 2.71212         | 4.85434         | 2.87065         | 2.86522         | 2.78415         | 2.83777         |
| 4u4s           | 2    | 9.23703         | 8.18462         | 8.18304         | 9.23386         | 9.2323          | 8.6831          | 8.37942         |
| <b>Average</b> |      | <b>3.264523</b> | <b>2.928413</b> | <b>3.359179</b> | <b>3.178056</b> | <b>3.118627</b> | <b>3.154289</b> | <b>3.067981</b> |



|                |   |                 |                 |                 |                 |                 |                 |                 |
|----------------|---|-----------------|-----------------|-----------------|-----------------|-----------------|-----------------|-----------------|
|                |   |                 |                 |                 |                 |                 |                 |                 |
| 1e66           | 3 | 0.3854          | 0.38638         | 0.38435         | 0.3896          | 0.38648         | 0.38791         | 0.38776         |
| 1gpk           | 3 | 0.22189         | 0.22189         | 0.22189         | 0.22197         | 0.22189         | 0.22186         | 0.22186         |
| 1qkt           | 3 | 0.90469         | 0.90481         | 0.90487         | 0.90498         | 0.90532         | 0.90666         | 0.90474         |
| 1uto           | 3 | 2.20172         | 1.06968         | 2.39818         | 1.02769         | 1.09121         | 1.04461         | 1.01903         |
| 1ydr           | 3 | 0.53186         | 0.52751         | 0.85777         | 0.52873         | 0.53054         | 0.53369         | 0.52901         |
| 2pog           | 3 | 0.37153         | 0.37188         | 0.37217         | 0.37165         | 0.37121         | 0.37162         | 0.37183         |
| 2wer           | 3 | 0.5368          | 0.5368          | 0.5368          | 0.53665         | 0.5368          | 0.5368          | 0.5368          |
| 3acw           | 3 | 1.39846         | 1.3606          | 1.43319         | 1.36117         | 1.32418         | 1.32374         | 1.32552         |
| 3ao4           | 3 | 1.61486         | 1.78815         | 2.76403         | 1.61282         | 1.48934         | 1.49369         | 1.84524         |
| 3bgz           | 3 | 1.05709         | 0.93617         | 0.88783         | 1.058           | 0.9972          | 1.05783         | 0.99796         |
| 3g31           | 3 | 3.59422         | 3.75698         | 3.6634          | 3.5941          | 3.59902         | 3.89666         | 3.82395         |
| 3gy4           | 3 | 1.58908         | 1.10394         | 0.98374         | 1.90434         | 1.21493         | 1.252           | 1.20792         |
| 3kgp           | 3 | 1.97869         | 1.35008         | 1.3268          | 1.87578         | 1.5358          | 1.52149         | 1.46911         |
| 3pyy           | 3 | 0.92037         | 0.54312         | 1.08672         | 0.99559         | 1.22624         | 0.47049         | 0.39756         |
| 3wtj           | 3 | 1.31817         | 0.81101         | 0.82202         | 1.31849         | 1.21638         | 1.67852         | 1.11129         |
| 4cr9           | 3 | 4.77142         | 4.77856         | 4.3702          | 4.77217         | 4.77767         | 4.35408         | 4.7698          |
| 4de1           | 3 | 1.19874         | 2.72623         | 6.54208         | 1.10395         | 2.77597         | 1.89046         | 2.79007         |
| 4de3           | 3 | 2.78122         | 0.46676         | 1.58274         | 5.94763         | 0.50057         | 0.63794         | 1.68422         |
| 4e6q           | 3 | 1.10289         | 0.93307         | 0.90567         | 1.11763         | 1.12518         | 1.11227         | 1.10831         |
| 4ih5           | 3 | 2.01441         | 2.88695         | 3.50305         | 1.89346         | 3.27269         | 2.70341         | 2.42568         |
| 4j21           | 3 | 0.20251         | 0.2025          | 0.2025          | 0.2025          | 0.20268         | 0.20355         | 0.20249         |
| 4llx           | 3 | 6.28084         | 10.63988        | 9.08407         | 10.7246         | 9.95499         | 9.69309         | 8.47368         |
| 4m0y           | 3 | 6.98409         | 6.88052         | 6.72732         | 6.98582         | 6.98334         | 6.93998         | 7.0111          |
| 5c28           | 3 | 2.51949         | 2.98614         | 2.15982         | 2.52033         | 2.51795         | 2.55135         | 2.51972         |
| <b>Average</b> |   | <b>1.936685</b> | <b>2.007067</b> | <b>2.238384</b> | <b>2.207069</b> | <b>2.031566</b> | <b>1.949321</b> | <b>1.963944</b> |
|                |   |                 |                 |                 |                 |                 |                 |                 |
| 1q8u           | 4 | 0.2952          | 0.29545         | 0.29566         | 0.29619         | 0.29566         | 0.29586         | 0.29619         |
| 1syi           | 4 | 0.78277         | 0.59247         | 0.65646         | 0.78277         | 0.78282         | 0.71889         | 0.78303         |
| 2al5           | 4 | 0.2225          | 0.22644         | 0.28717         | 0.2275          | 0.22592         | 0.22672         | 0.22513         |
| 2cbv           | 4 | 1.18177         | 1.46641         | 1.18159         | 0.33454         | 0.33432         | 1.18187         | 1.18257         |
| 2hb1           | 4 | 4.22938         | 1.78403         | 2.6057          | 3.8517          | 1.77653         | 3.1123          | 2.46276         |
| 2j7h           | 4 | 2.17399         | 2.17204         | 2.54141         | 2.16903         | 2.16978         | 2.16736         | 2.17469         |
| 2v00           | 4 | 1.34352         | 1.01632         | 1.94185         | 1.44886         | 1.22981         | 1.17933         | 1.36803         |
| 2wnc           | 4 | 2.85702         | 2.85373         | 3.05361         | 2.91216         | 2.89911         | 2.87587         | 2.86908         |
| 2wtv           | 4 | 1.79661         | 1.63603         | 1.61779         | 1.72602         | 1.71546         | 1.79675         | 1.72591         |
| 2ymd           | 4 | 1.09888         | 0.23963         | 0.23917         | 0.23103         | 0.23354         | 0.23344         | 0.23372         |
| 3b27           | 4 | 0.40877         | 0.40895         | 1.26776         | 0.40458         | 0.41018         | 0.40749         | 0.40797         |
| 3dx1           | 4 | 0.45284         | 1.18191         | 0.87272         | 0.45216         | 0.45214         | 0.66234         | 0.45229         |
| 3f3a           | 4 | 1.67715         | 1.56843         | 1.48704         | 1.67705         | 1.68571         | 1.59996         | 1.58102         |
| 3f3c           | 4 | 0.89442         | 0.36586         | 0.36461         | 0.89422         | 0.56371         | 0.69613         | 0.63014         |
| 3g0w           | 4 | 0.17916         | 0.17909         | 0.18109         | 0.17944         | 0.17939         | 0.17878         | 0.1803          |
| 3gr2           | 4 | 9.00632         | 10.25825        | 8.94994         | 8.76126         | 8.39146         | 9.43999         | 9.80492         |
| 3lka           | 4 | 5.23287         | 5.3476          | 5.31303         | 5.25343         | 5.18374         | 5.17975         | 5.3263          |
| 3n7a           | 4 | 0.3029          | 0.24456         | 0.23893         | 0.2533          | 0.21784         | 0.24939         | 0.24334         |
| 3qqs           | 4 | 5.02439         | 2.13272         | 2.36324         | 5.03672         | 3.40121         | 2.40344         | 2.54528         |
| 3rr4           | 4 | 0.4496          | 0.91093         | 2.93114         | 0.427           | 0.47174         | 0.46957         | 0.50894         |
| 3u8k           | 4 | 0.77728         | 0.75693         | 0.75714         | 0.77851         | 0.82604         | 0.8378          | 0.83383         |
| 3u8n           | 4 | 0.37261         | 0.36339         | 0.37236         | 0.37299         | 0.37337         | 0.3761          | 0.37836         |
| 4abg           | 4 | 1.41255         | 0.94121         | 0.84195         | 1.41358         | 1.77433         | 0.99222         | 1.02836         |
| 4ddh           | 4 | 1.55767         | 1.45579         | 1.30448         | 1.55561         | 1.50234         | 1.56081         | 1.56138         |
| 4dli           | 4 | 0.52989         | 0.52656         | 0.52677         | 0.52896         | 0.52513         | 0.52434         | 0.52747         |
| 4hge           | 4 | 1.30311         | 0.9958          | 1.65828         | 1.20805         | 1.30185         | 1.38848         | 0.9164          |

|                |          |                 |                 |                 |                 |                 |                 |                 |
|----------------|----------|-----------------|-----------------|-----------------|-----------------|-----------------|-----------------|-----------------|
| 4ivb           | 4        | 0.23434         | 0.23624         | 0.23638         | 0.23466         | 0.23505         | 0.23731         | 0.23585         |
| 4j28           | 4        | 1.00239         | 1.00061         | 1.00868         | 1.00382         | 1.00259         | 1.20022         | 1.00049         |
| <b>Average</b> |          | <b>1.671425</b> | <b>1.469906</b> | <b>1.61057</b>  | <b>1.586255</b> | <b>1.434313</b> | <b>1.506875</b> | <b>1.481563</b> |
| <b>1nc3</b>    | <b>5</b> | 0.18233         | 0.22667         | 0.25143         | 0.18221         | 0.18388         | 0.24889         | 0.18432         |
| <b>1o3f</b>    | <b>5</b> | 1.55459         | 1.91045         | 6.25815         | 1.533           | 1.53654         | 2.5194          | 1.55063         |
| <b>1oyt</b>    | <b>5</b> | 0.26459         | 0.26524         | 0.55058         | 0.2636          | 0.26302         | 0.26489         | 0.2625          |
| <b>1p1n</b>    | <b>5</b> | 1.22226         | 0.88996         | 0.86073         | 1.22273         | 0.98274         | 0.86126         | 0.86392         |
| <b>1p1q</b>    | <b>5</b> | 4.85901         | 3.63811         | 4.57653         | 4.85912         | 4.86622         | 5.10061         | 4.60331         |
| <b>1ps3</b>    | <b>5</b> | 0.48549         | 0.70009         | 0.48452         | 0.48337         | 0.4824          | 0.48482         | 0.48363         |
| <b>1q8t</b>    | <b>5</b> | 7.69295         | 7.74457         | 7.71577         | 7.67984         | 7.74494         | 7.73735         | 7.18478         |
| <b>2r9w</b>    | <b>5</b> | 7.38732         | 6.57263         | 6.38475         | 7.40428         | 7.28941         | 7.2686          | 6.65055         |
| <b>2wn9</b>    | <b>5</b> | 7.21338         | 6.73333         | 6.51904         | 7.21204         | 6.79956         | 7.03743         | 7.09944         |
| <b>2xj7</b>    | <b>5</b> | 0.28853         | 0.28547         | 0.28899         | 0.28834         | 0.28817         | 0.28827         | 0.28626         |
| <b>3d4z</b>    | <b>5</b> | 0.94002         | 3.53802         | 2.8398          | 0.95145         | 0.93258         | 1.80944         | 0.94716         |
| <b>3d6q</b>    | <b>5</b> | 7.02634         | 3.06929         | 5.18596         | 5.23573         | 3.88397         | 4.44927         | 2.93393         |
| <b>3dd0</b>    | <b>5</b> | 1.70595         | 1.83724         | 3.37157         | 1.17943         | 2.22897         | 1.70469         | 2.22759         |
| <b>3fcq</b>    | <b>5</b> | 9.39327         | 5.56845         | 3.5869          | 3.0742          | 3.05787         | 2.7894          | 3.78015         |
| <b>3fur</b>    | <b>5</b> | 1.60751         | 0.99882         | 1.11822         | 0.88236         | 0.87369         | 0.87914         | 0.88293         |
| <b>3gbb</b>    | <b>5</b> | 0.77196         | 0.58307         | 0.65556         | 0.80216         | 0.68571         | 0.74955         | 0.79186         |
| <b>3jvr</b>    | <b>5</b> | 0.69396         | 3.06163         | 4.54165         | 0.69219         | 0.59886         | 0.72557         | 0.62422         |
| <b>3qgy</b>    | <b>5</b> | 6.19046         | 1.93551         | 2.81212         | 6.19784         | 6.23152         | 5.72075         | 5.68124         |
| <b>3rlr</b>    | <b>5</b> | 0.28464         | 0.9516          | 0.62338         | 0.28181         | 0.29868         | 0.617           | 0.2924          |
| <b>3ryj</b>    | <b>5</b> | 1.47718         | 1.207           | 1.7363          | 1.42362         | 1.27954         | 0.95811         | 1.03351         |
| <b>3uuo</b>    | <b>5</b> | 1.11019         | 1.03699         | 1.12141         | 1.10942         | 1.11222         | 1.10942         | 1.1115          |
| <b>4e5w</b>    | <b>5</b> | 0.1477          | 0.45602         | 0.52016         | 0.14739         | 0.14721         | 0.14714         | 0.14735         |
| <b>4f9w</b>    | <b>5</b> | 0.31706         | 0.72069         | 1.01147         | 0.27199         | 0.26991         | 0.64429         | 0.36275         |
| <b>4gkm</b>    | <b>5</b> | 5.83666         | 4.41988         | 5.36238         | 5.81601         | 5.61666         | 5.25892         | 4.71939         |
| <b>4ih7</b>    | <b>5</b> | 1.13915         | 0.90204         | 0.57743         | 1.05998         | 1.13955         | 0.98076         | 1.13935         |
| <b>4ivc</b>    | <b>5</b> | 0.184           | 0.18176         | 0.28626         | 0.18518         | 0.18255         | 0.18381         | 0.18157         |
| <b>4k18</b>    | <b>5</b> | 0.60979         | 2.25621         | 2.2952          | 0.60984         | 0.61294         | 0.70239         | 1.00807         |
| <b>4kz6</b>    | <b>5</b> | 5.26356         | 1.79895         | 2.40705         | 5.2587          | 3.15675         | 3.55614         | 4.40819         |
| <b>4m0z</b>    | <b>5</b> | 0.46942         | 0.45513         | 0.45865         | 0.46806         | 0.46725         | 0.46104         | 0.45849         |
| <b>4mgd</b>    | <b>5</b> | 0.51393         | 0.43666         | 0.48328         | 0.87352         | 0.43065         | 0.51441         | 0.44303         |
| <b>4pcs</b>    | <b>5</b> | 0.26784         | 0.2659          | 0.34725         | 0.59773         | 0.26804         | 0.35413         | 0.34763         |
| <b>4qac</b>    | <b>5</b> | 0.47292         | 0.47459         | 0.47069         | 0.47459         | 0.47565         | 0.47385         | 0.4751          |
| <b>5aba</b>    | <b>5</b> | 6.15278         | 6.42645         | 5.66897         | 4.35284         | 4.6023          | 3.39291         | 3.40584         |
| <b>Average</b> |          | <b>2.537174</b> | <b>2.168134</b> | <b>2.465823</b> | <b>2.214381</b> | <b>2.090605</b> | <b>2.12102</b>  | <b>2.017351</b> |
| <b>1owh</b>    | <b>6</b> | 0.3249          | 0.32783         | 0.3293          | 0.32705         | 0.32789         | 2.17488         | 0.32696         |
| <b>1pxn</b>    | <b>6</b> | 2.48552         | 2.82506         | 2.1801          | 2.48709         | 2.44055         | 0.83728         | 2.29153         |
| <b>1w4o</b>    | <b>6</b> | 0.84045         | 0.75664         | 0.65299         | 0.84131         | 0.80899         | 1.38599         | 0.8386          |
| <b>2brb</b>    | <b>6</b> | 1.48009         | 1.31747         | 1.11967         | 1.4821          | 1.40112         | 1.15419         | 1.38526         |
| <b>2c3i</b>    | <b>6</b> | 4.28865         | 1.14818         | 1.26582         | 5.10108         | 1.70462         | 5.28037         | 1.27427         |
| <b>2j78</b>    | <b>6</b> | 4.90807         | 4.23577         | 5.25742         | 4.90865         | 5.24531         | 5.84161         | 5.31339         |
| <b>2p15</b>    | <b>6</b> | 9.48983         | 3.80304         | 4.6053          | 8.57975         | 4.4183          | 0.37085         | 4.9278          |
| <b>2qe4</b>    | <b>6</b> | 0.37528         | 0.36064         | 0.37001         | 0.37163         | 0.3717          | 0.57722         | 0.3668          |
| <b>2xnb</b>    | <b>6</b> | 0.57915         | 0.57779         | 0.57781         | 0.57927         | 0.58048         | 1.37097         | 0.578           |
| <b>3dx2</b>    | <b>6</b> | 1.2814          | 1.02089         | 1.50606         | 1.3706          | 1.41343         | 0.32479         | 1.36785         |
| <b>3dxg</b>    | <b>6</b> | 0.32548         | 1.13423         | 2.06946         | 0.32441         | 0.59627         | 5.34031         | 0.46846         |
| <b>3e93</b>    | <b>6</b> | 5.34743         | 4.98488         | 4.81875         | 5.34603         | 5.27698         | 0.32541         | 5.37676         |
| <b>3ebp</b>    | <b>6</b> | 0.56778         | 1.06863         | 0.90363         | 0.56225         | 0.57712         | 0.57419         | 0.58326         |
| <b>3f3d</b>    | <b>6</b> | 1.08224         | 1.00662         | 1.12021         | 1.04269         | 1.16003         | 1.08165         | 1.04113         |

|                |   |                 |                 |                 |                 |                 |                 |                 |
|----------------|---|-----------------|-----------------|-----------------|-----------------|-----------------|-----------------|-----------------|
| 3f3e           | 6 | 1.1415          | 0.94505         | 0.91161         | 1.39254         | 1.15043         | 1.29182         | 1.19251         |
| 3gc5           | 6 | 0.38294         | 0.76319         | 0.61311         | 0.38293         | 0.40453         | 0.56541         | 0.38231         |
| 3k5v           | 6 | 3.3836          | 3.27292         | 3.3041          | 3.40263         | 3.52935         | 3.43132         | 3.37514         |
| 3l7b           | 6 | 0.73854         | 0.73909         | 0.71408         | 0.73818         | 0.73914         | 0.73851         | 0.73868         |
| 3r88           | 6 | 12.77686        | 10.29806        | 9.49835         | 11.99331        | 11.0295         | 11.4074         | 11.16473        |
| 3syr           | 6 | 0.53472         | 0.53472         | 0.50538         | 0.53464         | 0.5348          | 0.53462         | 0.53473         |
| 3ui7           | 6 | 0.4941          | 0.49175         | 0.82199         | 0.48942         | 0.48899         | 0.49184         | 0.4909          |
| 3uo4           | 6 | 7.59781         | 3.8468          | 4.92585         | 8.71276         | 3.39828         | 5.43854         | 5.42998         |
| 4bkt           | 6 | 0.58224         | 0.57085         | 0.57402         | 0.58818         | 0.56425         | 0.57413         | 0.57731         |
| 4ivd           | 6 | 0.7292          | 1.57616         | 4.00863         | 0.72725         | 1.208           | 0.55829         | 0.62852         |
| 4jxs           | 6 | 2.6241          | 3.26719         | 4.11975         | 2.99891         | 3.24218         | 2.59335         | 1.73869         |
| 4rfm           | 6 | 4.39121         | 1.53261         | 1.88207         | 4.38932         | 2.57712         | 1.47343         | 2.25689         |
| 4twp           | 6 | 2.45562         | 1.10092         | 1.38276         | 2.61825         | 1.61578         | 2.01756         | 1.98833         |
| 5dwr           | 6 | 0.42145         | 0.93723         | 0.42141         | 0.42281         | 0.42143         | 0.63593         | 0.42143         |
| <b>Average</b> |   | <b>2.55822</b>  | <b>1.94436</b>  | <b>2.159273</b> | <b>2.596966</b> | <b>2.043806</b> | <b>2.085424</b> | <b>2.037865</b> |
| <b>Inc1</b>    | 7 | 0.24066         | 0.24346         | 0.24363         | 0.24829         | 0.24203         | 0.41285         | 0.24747         |
| 1y6r           | 7 | 0.44136         | 0.41607         | 0.4797          | 0.41476         | 0.41586         | 0.55946         | 0.41631         |
| 1yc1           | 7 | 0.56123         | 0.38379         | 0.38464         | 0.55903         | 0.55966         | 0.67424         | 0.55931         |
| 1z9g           | 7 | 0.69094         | 0.63711         | 0.89852         | 0.86677         | 0.69115         | 3.09766         | 0.65379         |
| 2fvd           | 7 | 5.77053         | 2.9139          | 4.71954         | 5.12309         | 2.86892         | 3.58928         | 3.6917          |
| 2vvn           | 7 | 9.57708         | 1.05156         | 2.19819         | 4.52459         | 3.9147          | 0.26535         | 5.40565         |
| 2w66           | 7 | 0.25801         | 1.97606         | 3.87185         | 0.25954         | 0.25889         | 0.36234         | 0.27572         |
| 2wvt           | 7 | 0.35851         | 0.83096         | 0.35915         | 0.35834         | 0.36112         | 0.81171         | 0.3558          |
| 2x00           | 7 | 0.65732         | 0.7375          | 1.18316         | 0.6579          | 0.67021         | 0.58136         | 0.69246         |
| 2xbv           | 7 | 0.5781          | 0.58661         | 0.57783         | 0.57322         | 0.58683         | 0.67212         | 0.57752         |
| 2xii           | 7 | 0.70027         | 0.80084         | 3.89754         | 0.61683         | 1.45218         | 0.55866         | 0.62423         |
| 2zb1           | 7 | 0.55438         | 3.73496         | 3.43008         | 0.55852         | 0.98722         | 0.34747         | 0.55842         |
| 3b65           | 7 | 0.35194         | 0.40133         | 0.66284         | 0.34472         | 0.34479         | 0.78482         | 0.36458         |
| 3cj4           | 7 | 0.9757          | 0.85422         | 0.44698         | 0.97591         | 0.67306         | 2.29943         | 0.84111         |
| 3e92           | 7 | 2.31318         | 2.33906         | 3.01739         | 2.31282         | 2.3124          | 0.244           | 2.29754         |
| 3ehy           | 7 | 3.88354         | 1.33045         | 2.70446         | 2.85535         | 1.4462          | 0.88767         | 1.46771         |
| 3fv2           | 7 | 0.16258         | 0.16188         | 0.33027         | 0.16235         | 0.16245         | 0.1622          | 0.16257         |
| 3g2n           | 7 | 1.31933         | 1.31209         | 1.3906          | 1.31971         | 1.31813         | 1.31896         | 1.32209         |
| 3nq9           | 7 | 5.4585          | 6.6981          | 6.42759         | 7.31686         | 7.16904         | 6.80885         | 5.98151         |
| 3up2           | 7 | 2.66309         | 2.32921         | 3.00595         | 2.65292         | 2.44557         | 3.53549         | 2.59191         |
| 4ciw           | 7 | 0.34879         | 0.34409         | 0.39973         | 0.34886         | 0.34896         | 0.34391         | 0.34485         |
| 4de2           | 7 | 0.54618         | 1.42138         | 2.60415         | 0.56376         | 2.44103         | 0.70193         | 0.55542         |
| 4djv           | 7 | 0.39782         | 0.4964          | 1.70845         | 0.39443         | 0.38552         | 0.40948         | 0.39661         |
| 4eor           | 7 | 1.44291         | 2.30712         | 2.8152          | 2.63872         | 3.67238         | 3.38206         | 3.3404          |
| 4f2w           | 7 | 0.26163         | 0.25749         | 0.25783         | 0.2591          | 0.26222         | 0.25754         | 0.26182         |
| 4j3l           | 7 | 1.3117          | 1.29021         | 1.26819         | 1.3275          | 1.31768         | 1.31734         | 1.32388         |
| 4jfs           | 7 | 1.44812         | 1.37091         | 1.5096          | 1.44528         | 1.43245         | 1.44433         | 1.44922         |
| 4jia           | 7 | 8.77155         | 1.71753         | 2.30615         | 8.69786         | 6.34986         | 7.15519         | 5.94726         |
| 4lzs           | 7 | 0.57778         | 0.97093         | 1.17041         | 0.57989         | 0.58351         | 0.57857         | 0.57917         |
| <b>Average</b> |   | <b>1.814577</b> | <b>1.376387</b> | <b>1.871366</b> | <b>1.68817</b>  | <b>1.574966</b> | <b>1.502216</b> | <b>1.492622</b> |
| <b>1bzc</b>    | 8 | 1.18168         | 1.27754         | 1.77513         | 1.08486         | 0.97916         | 1.04735         | 0.97047         |
| 1sqa           | 8 | 1.95677         | 1.9061          | 2.62343         | 1.67183         | 1.89315         | 1.8374          | 1.75725         |
| 1ydt           | 8 | 4.71815         | 5.01687         | 7.19313         | 4.57889         | 5.63391         | 6.44029         | 6.08275         |
| 1z95           | 8 | 0.98762         | 0.70898         | 0.70965         | 0.84906         | 0.61606         | 0.75692         | 0.84442         |
| 2br1           | 8 | 1.93081         | 1.94698         | 1.5966          | 1.93226         | 1.94846         | 1.81932         | 1.95142         |
| 2cet           | 8 | 7.93321         | 3.88406         | 6.11139         | 7.93673         | 7.82041         | 7.26297         | 7.93634         |

|                |    |                 |                 |                 |                 |                 |                 |                 |
|----------------|----|-----------------|-----------------|-----------------|-----------------|-----------------|-----------------|-----------------|
| 2qbr           | 8  | 6.29572         | 4.94642         | 5.63194         | 6.43807         | 4.0395          | 2.4372          | 2.08543         |
| 2v7a           | 8  | 1.34039         | 0.77958         | 0.92687         | 1.16813         | 1.00053         | 0.83165         | 0.73698         |
| 2w4x           | 8  | 0.71503         | 1.24564         | 2.64426         | 0.71454         | 0.71478         | 0.71367         | 0.71516         |
| 2xb8           | 8  | 0.36444         | 0.36413         | 0.32703         | 0.36836         | 0.36498         | 0.36865         | 0.36591         |
| 2xdl           | 8  | 0.31951         | 0.31658         | 0.51142         | 0.31754         | 0.31695         | 0.31718         | 0.32131         |
| 2zcg           | 8  | 5.65792         | 5.71891         | 5.57502         | 5.6306          | 5.75809         | 5.73864         | 5.68189         |
| 2zy1           | 8  | 5.15022         | 2.38598         | 2.88068         | 2.899           | 2.94654         | 2.50345         | 3.14944         |
| 3aru           | 8  | 3.31789         | 1.79968         | 3.51376         | 3.30831         | 1.97934         | 2.33911         | 2.27719         |
| 3b5r           | 8  | 0.66888         | 0.6544          | 0.72762         | 0.67099         | 0.70947         | 0.66271         | 0.6913          |
| 3fv1           | 8  | 0.70276         | 0.44466         | 0.36696         | 0.49638         | 0.44521         | 0.34309         | 0.34329         |
| 3ge7           | 8  | 0.92161         | 1.10715         | 0.8748          | 0.92178         | 0.91832         | 1.06042         | 0.88523         |
| 3ivg           | 8  | 1.68838         | 1.52451         | 2.60149         | 1.679           | 1.64178         | 1.62529         | 1.49646         |
| 3jvs           | 8  | 3.01946         | 2.34805         | 3.23497         | 2.77201         | 2.50014         | 2.34957         | 2.43147         |
| 3mss           | 8  | 2.79076         | 2.59432         | 4.50898         | 2.79513         | 3.26226         | 2.66983         | 2.85134         |
| 3n76           | 8  | 1.46596         | 0.97354         | 1.12795         | 1.28705         | 1.11721         | 1.11725         | 1.13169         |
| 3n86           | 8  | 0.95558         | 0.90634         | 0.89671         | 0.95914         | 0.95811         | 0.95321         | 0.96233         |
| 3p5o           | 8  | 1.16947         | 1.17084         | 1.29415         | 1.17574         | 1.16765         | 1.17017         | 1.17175         |
| 4dld           | 8  | 1.8973          | 2.04796         | 2.9603          | 1.12811         | 0.66815         | 0.54735         | 0.59874         |
| 4qd6           | 8  | 5.07934         | 4.65817         | 5.37919         | 5.1733          | 2.59941         | 2.41781         | 2.79801         |
| 4wiv           | 8  | 1.21453         | 1.93269         | 4.38154         | 1.24426         | 1.15794         | 1.13468         | 1.2039          |
| <b>Average</b> |    | <b>2.44013</b>  | <b>2.025388</b> | <b>2.70673</b>  | <b>2.276964</b> | <b>2.04452</b>  | <b>1.940968</b> | <b>1.978518</b> |
|                |    |                 |                 |                 |                 |                 |                 |                 |
| 1k1i           | 9  | 4.75855         | 3.40564         | 6.35836         | 4.73076         | 4.48193         | 4.48188         | 3.65537         |
| 1mq6           | 9  | 1.3627          | 4.49616         | 4.67114         | 1.35284         | 1.95052         | 4.20733         | 1.03745         |
| 1nvq           | 9  | 5.34053         | 3.01967         | 3.78508         | 5.34206         | 5.33895         | 4.95344         | 5.34092         |
| 1o0h           | 9  | 1.39461         | 3.96663         | 5.82607         | 2.26493         | 2.94649         | 1.83814         | 1.23234         |
| 2y5h           | 9  | 2.21677         | 4.27262         | 5.28479         | 2.10607         | 1.35176         | 1.91968         | 1.96663         |
| 2zda           | 9  | 0.89595         | 0.49449         | 2.23291         | 0.53363         | 0.47085         | 0.49139         | 0.59684         |
| 3e5a           | 9  | 1.18398         | 1.20739         | 3.24625         | 1.14686         | 1.12904         | 1.05009         | 1.05769         |
| 3gnw           | 9  | 0.29316         | 1.06046         | 2.29311         | 0.29469         | 0.29582         | 0.29372         | 0.29317         |
| 3u9q           | 9  | 1.14655         | 0.88457         | 1.13842         | 1.13383         | 1.36235         | 1.11418         | 1.0313          |
| 3wz8           | 9  | 2.11855         | 1.8226          | 4.92274         | 2.00509         | 1.87043         | 1.82968         | 1.95058         |
| 4cra           | 9  | 2.15297         | 1.40533         | 4.50436         | 1.29636         | 0.43194         | 0.33065         | 0.83838         |
| 4crc           | 9  | 0.67806         | 1.35073         | 5.03315         | 2.56121         | 0.52286         | 1.40983         | 0.73989         |
| 4f3c           | 9  | 1.34634         | 0.4678          | 0.39678         | 0.59447         | 0.39836         | 0.37277         | 0.46752         |
| 4ty7           | 9  | 9.80336         | 6.67716         | 5.69553         | 9.79886         | 2.64055         | 3.67502         | 3.07386         |
| 4w9i           | 9  | 1.45983         | 1.31287         | 2.71138         | 1.43209         | 1.44113         | 1.35618         | 1.35955         |
| 4x6p           | 9  | 0.88988         | 3.643           | 6.67568         | 2.21373         | 1.73309         | 1.79413         | 0.96288         |
| <b>Average</b> |    | <b>2.315112</b> | <b>2.467945</b> | <b>4.048484</b> | <b>2.425468</b> | <b>1.772879</b> | <b>1.944882</b> | <b>1.600273</b> |
|                |    |                 |                 |                 |                 |                 |                 |                 |
| 1z6e           | 10 | 1.18685         | 3.13794         | 7.25234         | 1.11378         | 0.36085         | 0.34293         | 0.37161         |
| 2qbp           | 10 | 1.03503         | 3.89592         | 5.00297         | 0.93612         | 1.05946         | 1.11179         | 0.81616         |
| 2qnq           | 10 | 0.48288         | 0.48411         | 2.34965         | 0.48399         | 0.48409         | 0.48495         | 0.48531         |
| 3arq           | 10 | 10.19791        | 3.40043         | 3.90753         | 10.19364        | 9.13494         | 9.33094         | 8.37431         |
| 3ejr           | 10 | 1.78485         | 5.64191         | 5.03424         | 1.33114         | 3.43925         | 1.55881         | 2.42855         |
| 3nx7           | 10 | 1.47026         | 1.24115         | 2.73731         | 1.34656         | 1.37326         | 1.98409         | 1.37474         |
| 3oe4           | 10 | 0.63582         | 6.34745         | 3.93124         | 0.63766         | 1.66254         | 4.32871         | 0.53952         |
| 3ozt           | 10 | 1.05731         | 4.06038         | 2.38057         | 1.04107         | 0.58601         | 0.52271         | 0.47046         |
| 3zdg           | 10 | 0.51626         | 0.51634         | 0.72256         | 0.5132          | 0.51399         | 0.51497         | 0.51984         |
| 3zsx           | 10 | 5.4442          | 3.82755         | 4.71521         | 4.31782         | 3.96547         | 3.55943         | 1.84238         |
| 4w9c           | 10 | 0.97269         | 1.11428         | 3.87351         | 1.65637         | 0.39846         | 0.61064         | 0.50423         |
| <b>Average</b> |    | <b>2.253096</b> | <b>3.060678</b> | <b>3.809739</b> | <b>2.14285</b>  | <b>2.088938</b> | <b>2.213634</b> | <b>1.611555</b> |

|                |    |                 |                 |                 |                 |                 |                 |                 |
|----------------|----|-----------------|-----------------|-----------------|-----------------|-----------------|-----------------|-----------------|
| 1vso           | 11 | 1.50242         | 2.56596         | 3.12116         | 1.38238         | 1.39305         | 1.46593         | 1.53672         |
| 2qbq           | 11 | 2.17251         | 8.38656         | 8.35867         | 3.60895         | 3.3898          | 2.46415         | 2.80466         |
| 2vw5           | 11 | 1.65155         | 0.2072          | 0.21144         | 0.22266         | 0.21361         | 0.20934         | 0.20729         |
| 2wca           | 11 | 3.91884         | 3.84726         | 4.06423         | 3.92724         | 3.9666          | 3.78817         | 3.70149         |
| 2yfe           | 11 | 1.47749         | 1.20453         | 1.39538         | 1.48307         | 1.47193         | 1.44147         | 1.44564         |
| 2zcr           | 11 | 3.20755         | 1.71029         | 1.45441         | 2.73713         | 2.50355         | 2.17485         | 2.72631         |
| 3b68           | 11 | 1.07552         | 0.79567         | 1.01253         | 1.08871         | 0.80536         | 0.77868         | 0.77564         |
| 3nw9           | 11 | 0.34428         | 4.14505         | 5.89853         | 0.34807         | 0.44146         | 1.34721         | 0.55198         |
| 3oe5           | 11 | 0.68607         | 4.02839         | 6.02372         | 0.58666         | 0.66271         | 0.77913         | 0.77156         |
| 3ozs           | 11 | 0.69827         | 3.33288         | 2.06077         | 0.52031         | 1.63051         | 0.54104         | 1.61739         |
| 3ueu           | 11 | 4.35596         | 4.2991          | 3.82336         | 4.38155         | 4.46242         | 4.31145         | 5.30922         |
| 4agn           | 11 | 4.58765         | 4.86874         | 4.58869         | 4.62351         | 2.56636         | 2.8968          | 1.91326         |
| 4eky           | 11 | 0.65612         | 0.65611         | 0.6331          | 0.65533         | 0.6575          | 0.65575         | 0.65526         |
| 5c2h           | 11 | 1.52201         | 2.01719         | 4.76873         | 1.45511         | 1.10996         | 3.29897         | 1.46447         |
| <b>Average</b> |    | <b>1.989731</b> | <b>3.004638</b> | <b>3.386766</b> | <b>1.930049</b> | <b>1.805344</b> | <b>1.868067</b> | <b>1.820064</b> |
| 2p4y           | 12 | 1.38927         | 0.57693         | 0.5962          | 0.71767         | 0.68373         | 0.65932         | 0.56945         |
| 2wbg           | 12 | 2.74531         | 3.74911         | 2.61654         | 2.70283         | 3.10654         | 3.24061         | 3.15412         |
| 3b1m           | 12 | 0.70251         | 1.02026         | 0.71069         | 1.18929         | 1.35186         | 1.51678         | 1.51798         |
| 4agp           | 12 | 3.72278         | 6.04213         | 7.49918         | 4.33918         | 2.54862         | 2.2602          | 2.52818         |
| 4agq           | 12 | 2.81875         | 4.90779         | 7.25982         | 3.30261         | 2.68283         | 4.11794         | 3.46834         |
| 4ea2           | 12 | 2.4135          | 2.75877         | 2.39154         | 2.34184         | 2.25033         | 2.28684         | 2.26917         |
| 4eo8           | 12 | 0.78287         | 0.80168         | 1.50751         | 0.74124         | 0.91554         | 0.95914         | 0.74366         |
| <b>Average</b> |    | <b>2.082141</b> | <b>2.836667</b> | <b>3.225926</b> | <b>2.190666</b> | <b>1.934207</b> | <b>2.14869</b>  | <b>2.035843</b> |
| 1h22           | 13 | 9.64256         | 3.31598         | 4.67747         | 7.32938         | 6.93513         | 6.44473         | 7.26746         |
| 2fxs           | 13 | 6.01932         | 4.91184         | 4.91078         | 5.89046         | 5.60782         | 6.07173         | 5.99627         |
| 2yge           | 13 | 0.5578          | 0.55486         | 1.93813         | 0.55618         | 0.55907         | 0.56117         | 0.55801         |
| 3coz           | 13 | 0.65931         | 1.23855         | 1.27833         | 0.67858         | 0.6144          | 0.62591         | 0.60005         |
| 3kwa           | 13 | 3.79003         | 3.93038         | 4.67608         | 3.65918         | 3.9876          | 4.18097         | 4.10297         |
| 3myg           | 13 | 3.02405         | 1.92773         | 6.02241         | 1.41102         | 2.2426          | 1.54247         | 0.95833         |
| 3uev           | 13 | 1.75649         | 2.10079         | 2.77857         | 1.76574         | 1.83453         | 2.67864         | 2.75985         |
| 4cig           | 13 | 6.34777         | 6.10362         | 6.11168         | 6.2843          | 5.2896          | 5.79614         | 2.46914         |
| 4w9h           | 13 | 1.5825          | 1.79827         | 3.09346         | 1.54667         | 1.56581         | 1.47617         | 1.44984         |
| 5a7b           | 13 | 3.0614          | 3.7829          | 3.85084         | 3.54125         | 2.8477          | 3.05287         | 2.30456         |
| <b>Average</b> |    | <b>3.644123</b> | <b>2.966492</b> | <b>3.933775</b> | <b>3.266276</b> | <b>3.148426</b> | <b>3.24308</b>  | <b>2.846648</b> |
| 1g2k           | 14 | 0.99409         | 0.90261         | 0.89198         | 1.11665         | 1.00176         | 0.97449         | 0.95391         |
| 1lpg           | 14 | 9.54336         | 4.50576         | 4.79628         | 5.80945         | 1.12713         | 3.26108         | 3.19973         |
| 1qfl           | 14 | 0.78445         | 1.3336          | 3.43038         | 0.71747         | 0.65151         | 0.67852         | 0.76824         |
| 3coy           | 14 | 0.32919         | 1.09458         | 1.57415         | 0.4067          | 0.29055         | 0.28806         | 0.33177         |
| 4gr0           | 14 | 2.36354         | 2.02892         | 3.54389         | 2.21469         | 1.22383         | 1.2816          | 1.13808         |
| <b>Average</b> |    | <b>2.802926</b> | <b>1.973094</b> | <b>2.847336</b> | <b>2.052992</b> | <b>0.858956</b> | <b>1.29675</b>  | <b>1.278346</b> |
| 1a30           | 15 | 7.37267         | 5.86502         | 5.21152         | 8.29383         | 6.18523         | 5.81915         | 6.88113         |
| 1h23           | 15 | 9.76612         | 6.25236         | 6.4895          | 7.4932          | 5.55406         | 6.79313         | 4.60313         |
| 3arp           | 15 | 10.12363        | 4.81637         | 6.90944         | 9.48277         | 10.01933        | 8.40873         | 7.87461         |
| 3tsk           | 15 | 3.83177         | 2.46799         | 3.21978         | 3.84614         | 2.27556         | 2.917           | 2.4618          |
| 3uew           | 15 | 3.85362         | 3.25654         | 4.07584         | 3.31679         | 4.26717         | 5.48226         | 2.8406          |
| 3zso           | 15 | 0.94985         | 4.6343          | 5.42365         | 5.91373         | 1.1606          | 3.73352         | 1.69536         |
| 4ogj           | 15 | 6.95353         | 3.32914         | 5.08547         | 7.42102         | 7.17069         | 6.04413         | 6.99399         |
| <b>Average</b> |    | <b>6.121599</b> | <b>4.374531</b> | <b>5.202171</b> | <b>6.538211</b> | <b>5.233234</b> | <b>5.599703</b> | <b>4.764374</b> |

|                |           |                 |                 |                 |                 |                 |                 |                 |
|----------------|-----------|-----------------|-----------------|-----------------|-----------------|-----------------|-----------------|-----------------|
| <b>1u1b</b>    | <b>16</b> | 2.45255         | 4.07582         | 6.25476         | 4.47402         | 1.89108         | 4.85934         | 3.17784         |
| <b>3bv9</b>    | <b>16</b> | 0.88078         | 1.68325         | 2.37323         | 0.88355         | 0.77469         | 0.83775         | 0.77129         |
| <b>3utu</b>    | <b>16</b> | 5.36746         | 5.83622         | 5.98811         | 3.29256         | 3.20212         | 3.43651         | 3.15768         |
| <b>Average</b> |           | <b>2.900263</b> | <b>3.865097</b> | <b>4.872033</b> | <b>2.883377</b> | <b>1.955963</b> | <b>3.044533</b> | <b>2.368937</b> |
| <b>1eby</b>    | <b>17</b> | 0.36822         | 0.36807         | 1.41598         | 0.36648         | 0.36751         | 0.36556         | 0.3694          |
| <b>3o9i</b>    | <b>17</b> | 0.41138         | 0.41586         | 1.25927         | 0.35341         | 0.36372         | 0.36372         | 0.35507         |
| <b>3pww</b>    | <b>17</b> | 1.97791         | 1.06775         | 3.00877         | 1.37583         | 0.8008          | 0.91613         | 0.94559         |
| <b>3uex</b>    | <b>17</b> | 4.22664         | 3.80814         | 3.90297         | 4.36656         | 4.17119         | 4.1552          | 3.79085         |
| <b>4tmn</b>    | <b>17</b> | 6.83212         | 7.14642         | 8.16875         | 3.86872         | 3.82819         | 4.97444         | 2.61689         |
| <b>Average</b> |           | <b>2.763254</b> | <b>2.561248</b> | <b>3.551148</b> | <b>2.0662</b>   | <b>1.906282</b> | <b>2.15501</b>  | <b>1.61556</b>  |
| <b>5tmn</b>    | <b>18</b> | <b>5.40224</b>  | <b>5.52766</b>  | <b>5.35895</b>  | <b>2.76089</b>  | <b>2.48901</b>  | <b>2.74153</b>  | <b>2.70734</b>  |
| <b>4w9l</b>    | <b>19</b> | <b>1.3026</b>   | <b>1.01213</b>  | <b>1.1766</b>   | <b>1.27555</b>  | <b>1.30811</b>  | <b>1.24374</b>  | <b>1.2822</b>   |
| <b>2vkm</b>    | <b>20</b> | <b>2.33779</b>  | <b>1.49402</b>  | <b>2.92473</b>  | <b>2.03441</b>  | <b>1.78716</b>  | <b>1.80564</b>  | <b>1.78867</b>  |
| <b>4gid</b>    | <b>23</b> | <b>2.69205</b>  | <b>0.4652</b>   | <b>0.58878</b>  | <b>0.73502</b>  | <b>0.80647</b>  | <b>0.84427</b>  | <b>0.87129</b>  |
| <b>3prs</b>    | <b>24</b> | <b>2.0391</b>   | <b>3.82227</b>  | <b>4.43011</b>  | <b>1.9732</b>   | <b>1.93766</b>  | <b>2.07144</b>  | <b>2.02506</b>  |
| <b>3uri</b>    | <b>33</b> | <b>11.99391</b> | <b>2.04019</b>  | <b>4.2325</b>   | <b>9.59937</b>  | <b>2.48888</b>  | <b>3.60815</b>  | <b>2.17813</b>  |
| <b>3ag9</b>    | <b>36</b> | <b>10.03285</b> | <b>8.67705</b>  | <b>9.01488</b>  | <b>8.67273</b>  | <b>10.11324</b> | <b>9.07064</b>  | <b>9.01759</b>  |

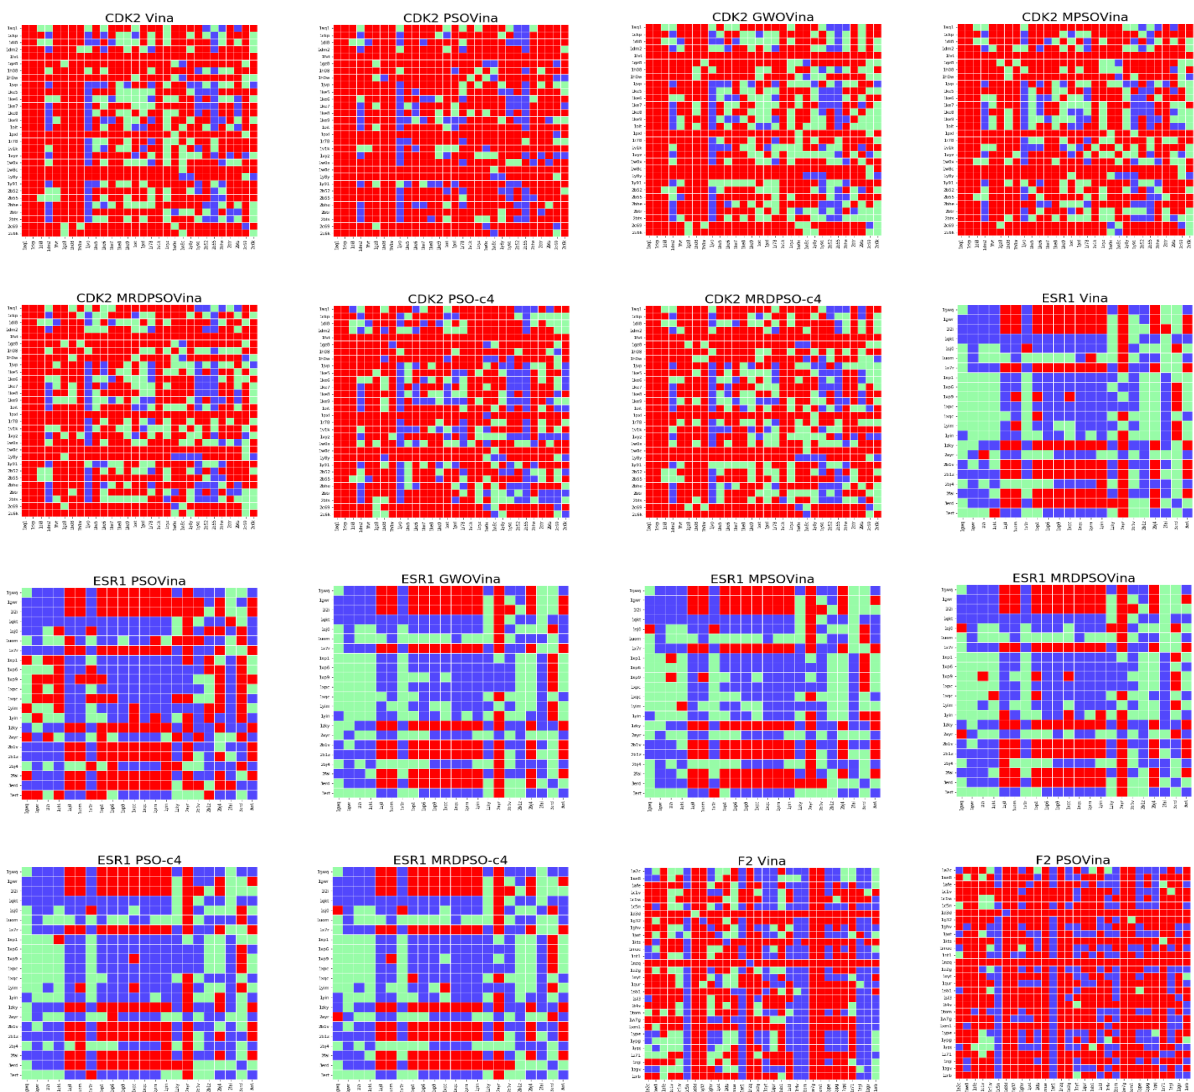

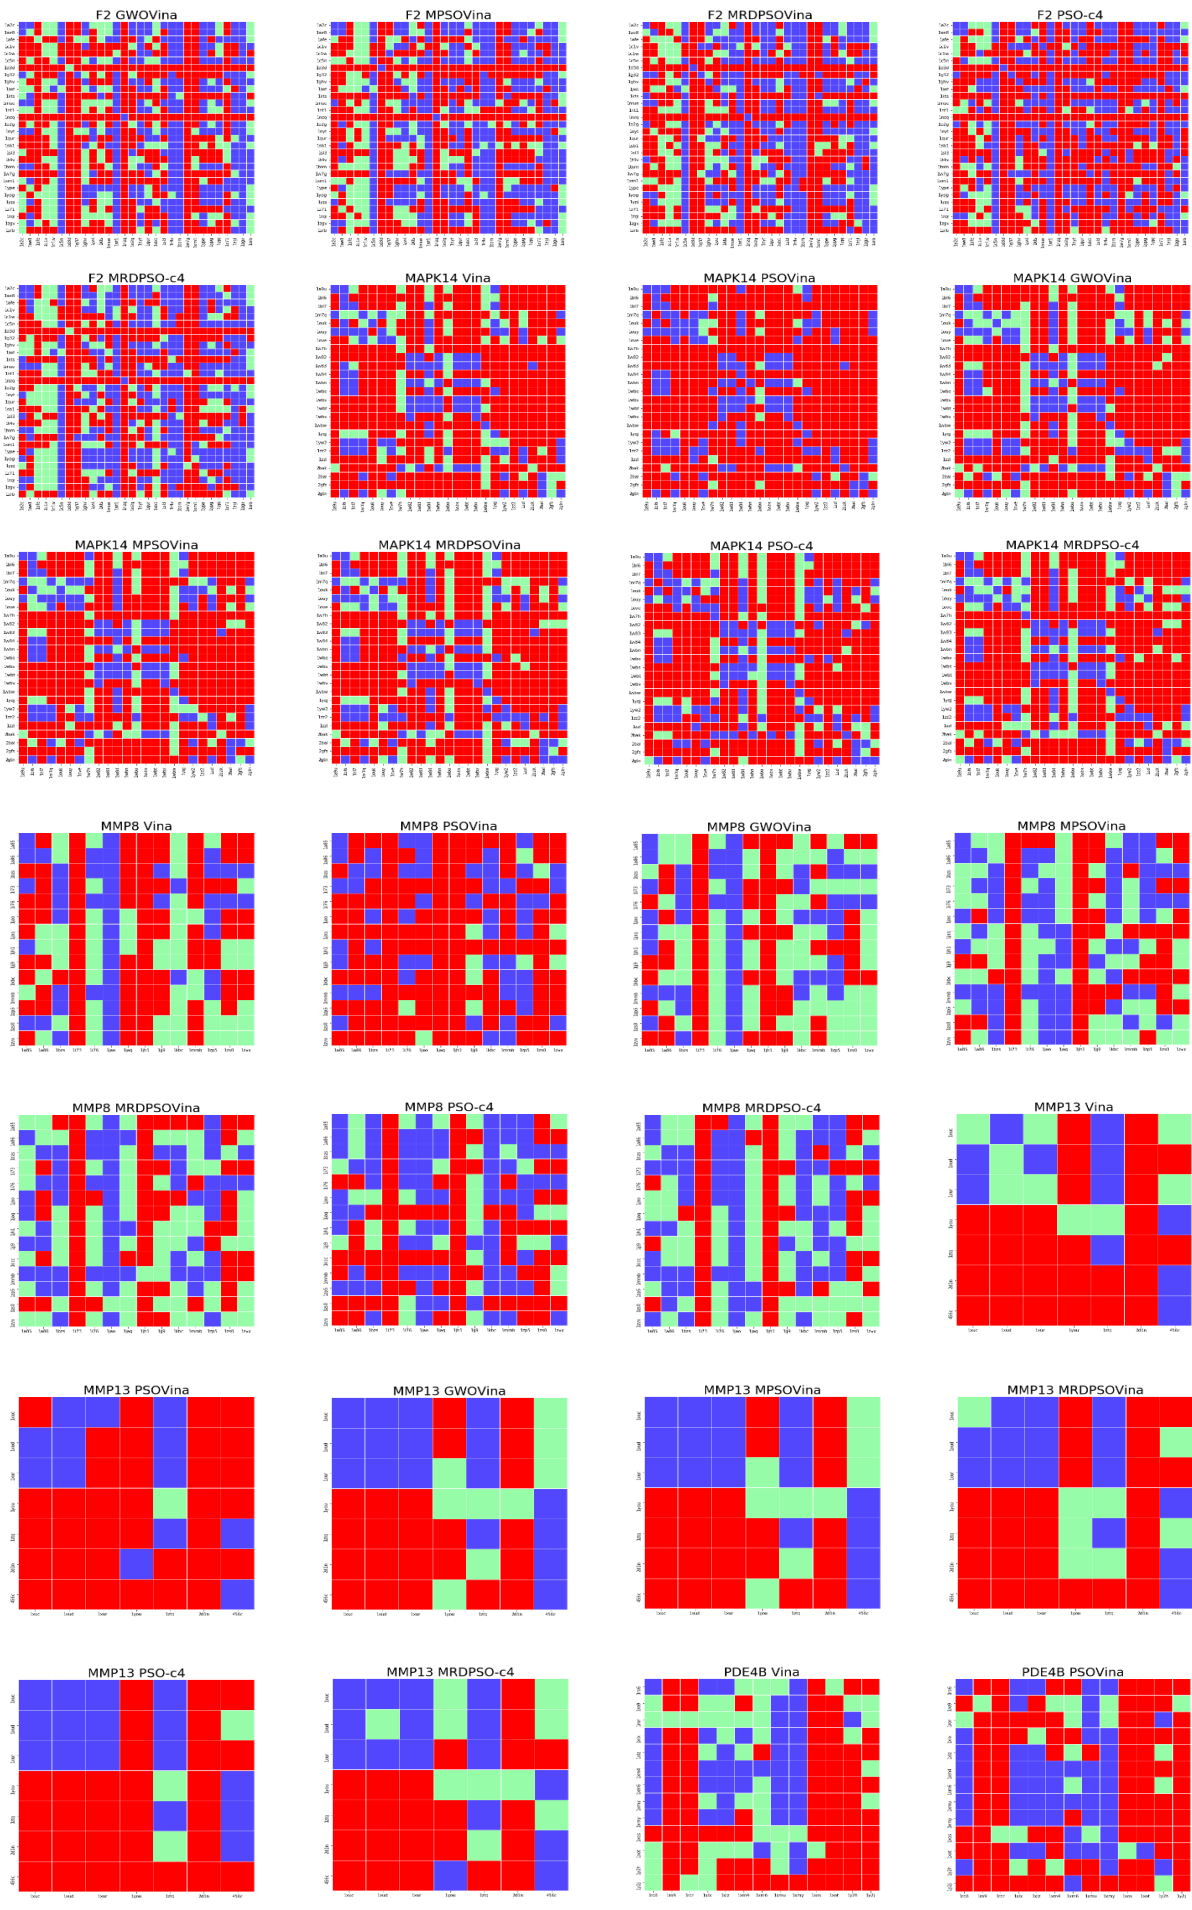

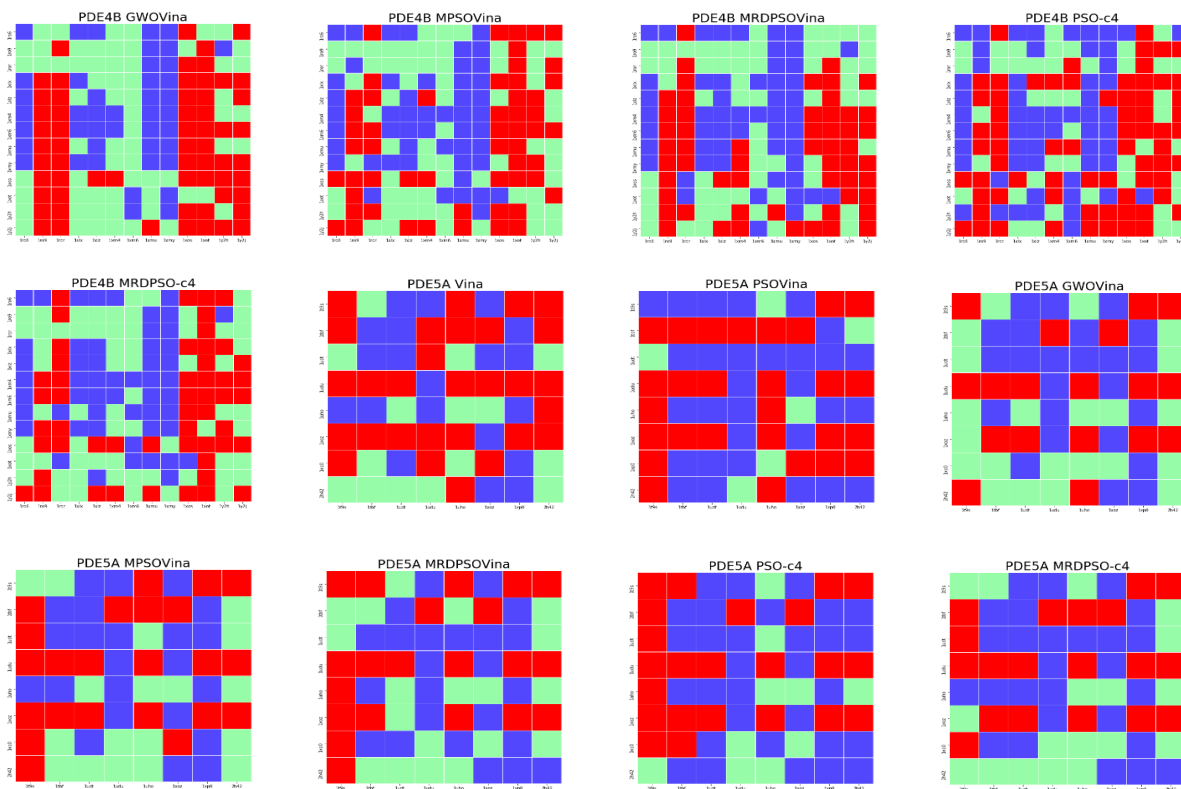

**Figure S2.** The cross-docking comparison of Vina and Vina-based programs. The cross-docking results were divided into failed sampling (red), failed scoring (green) and successful docking (blue).
